# Supplementary material for: Mono- and tri-β-substituted unsymmetrical metalloporphyrins: synthesis, structural, spectral and electrochemical properties
Source: Royal Society of Chemistry journal article supplement (doi:10.1039/c5ra12711d), 2015-01-01
Supplement: c5ra12711d1.pdf [file c5ra12711d1.pdf]

## Electronic Supplementary Information for Mono- and Tri- $\beta$ -Substituted Unsymmetrical Metalloporphyrins: Synthesis, Structural, Spectral and Electrochemical Properties

Kamal Prakash, Ravi Kumar and Muniappan Sankar\*

<sup>[a]</sup>Department of Chemistry, Indian Institute of Technology Roorkee, Roorkee – 247667, India

### Table of contents (TOC)

|                                                                                                                                                                                                                                                                                                                                                                                                                                                                                                                                                                                                                                                                                          | Page No |
|------------------------------------------------------------------------------------------------------------------------------------------------------------------------------------------------------------------------------------------------------------------------------------------------------------------------------------------------------------------------------------------------------------------------------------------------------------------------------------------------------------------------------------------------------------------------------------------------------------------------------------------------------------------------------------------|---------|
| <b>Scheme S1.</b> Synthetic scheme for MTPP(X)Y <sub>2</sub> .                                                                                                                                                                                                                                                                                                                                                                                                                                                                                                                                                                                                                           | 4       |
| <b>Figure S1.</b> B3LYP/ 6-311g(d,p) optimised geometries showing top as well as side views of H <sub>2</sub> TPP(CHO) ( <b>a</b> and <b>d</b> ), H <sub>2</sub> TPP(CH <sub>2</sub> OH) ( <b>b</b> and <b>e</b> ) and H <sub>2</sub> TPP(COOH) ( <b>c</b> and <b>f</b> ), respectively. In side view, the $\beta$ -substituents and <i>meso</i> -phenyl groups are not shown for clarity. The displacement of porphyrin-core atoms in Å from the mean plane are shown in figures <b>g</b> , <b>h</b> and <b>i</b> for H <sub>2</sub> TPP(CHO), H <sub>2</sub> TPP(CH <sub>2</sub> OH) and H <sub>2</sub> TPP(COOH) respectively. Color codes for atoms: C (grey), N (blue) and O (red). | 5       |
| <b>Figure S2.</b> UV-Visible spectra of <b>1</b> , <b>4</b> and <b>5</b> in CH <sub>2</sub> Cl <sub>2</sub> at 298 K.                                                                                                                                                                                                                                                                                                                                                                                                                                                                                                                                                                    | 7       |
| <b>Figure S3.</b> UV-Visible spectra of <b>1</b> and <b>1d</b> in CH <sub>2</sub> Cl <sub>2</sub> at 298 K.                                                                                                                                                                                                                                                                                                                                                                                                                                                                                                                                                                              | 7       |
| <b>Figure S4.</b> UV-Visible spectra of <b>4</b> and <b>4d</b> in CH <sub>2</sub> Cl <sub>2</sub> at 298 K.                                                                                                                                                                                                                                                                                                                                                                                                                                                                                                                                                                              | 8       |
| <b>Figure S5.</b> UV-Visible spectra of <b>1d-5d</b> in CH <sub>2</sub> Cl <sub>2</sub> at 298 K.                                                                                                                                                                                                                                                                                                                                                                                                                                                                                                                                                                                        | 8       |
| <b>Figure S6.</b> UV-Visible spectra of <b>1d-3d</b> in CH <sub>2</sub> Cl <sub>2</sub> at 298 K.                                                                                                                                                                                                                                                                                                                                                                                                                                                                                                                                                                                        | 9       |
| <b>Figure S7.</b> UV-Visible spectra of <b>1d</b> , <b>4d</b> and <b>5d</b> in CH <sub>2</sub> Cl <sub>2</sub> at 298 K.                                                                                                                                                                                                                                                                                                                                                                                                                                                                                                                                                                 | 9       |
| <b>Figure S8.</b> Fluorescence spectra of <b>1-5</b> in CH <sub>2</sub> Cl <sub>2</sub> at 298 K.                                                                                                                                                                                                                                                                                                                                                                                                                                                                                                                                                                                        | 11      |
| <b>Figure S9.</b> Fluorescence spectra of <b>1a-5a</b> in CH <sub>2</sub> Cl <sub>2</sub> at 298 K.                                                                                                                                                                                                                                                                                                                                                                                                                                                                                                                                                                                      | 11      |
| <b>Figure S10.</b> Fluorescence spectra of <b>1</b> and <b>1a</b> in CH <sub>2</sub> Cl <sub>2</sub> at 298 K.                                                                                                                                                                                                                                                                                                                                                                                                                                                                                                                                                                           | 12      |
| <b>Figure S11.</b> Fluorescence spectra of <b>4</b> and <b>4a</b> in CH <sub>2</sub> Cl <sub>2</sub> at 298 K.                                                                                                                                                                                                                                                                                                                                                                                                                                                                                                                                                                           | 12      |
| <b>Figure S12.</b> Fluorescence spectra of <b>5</b> and <b>5a</b> in CH <sub>2</sub> Cl <sub>2</sub> at 298 K.                                                                                                                                                                                                                                                                                                                                                                                                                                                                                                                                                                           | 13      |
| <b>Figure S13.</b> Fluorescence spectra of <b>3</b> and <b>3a</b> in CH <sub>2</sub> Cl <sub>2</sub> at 298 K.                                                                                                                                                                                                                                                                                                                                                                                                                                                                                                                                                                           | 13      |
| <b>Figure S14.</b> Fluorescence spectra of <b>2</b> and <b>2a</b> in CH <sub>2</sub> Cl <sub>2</sub> at 298 K.                                                                                                                                                                                                                                                                                                                                                                                                                                                                                                                                                                           | 14      |
| <b>Figure S15.</b> <sup>1</sup> H NMR spectrum of <b>1</b> in CDCl <sub>3</sub> at 298 K.                                                                                                                                                                                                                                                                                                                                                                                                                                                                                                                                                                                                | 15      |

|                                                                                                                                                                                                                                                                                                                                                                                         |       |
|-----------------------------------------------------------------------------------------------------------------------------------------------------------------------------------------------------------------------------------------------------------------------------------------------------------------------------------------------------------------------------------------|-------|
| <b>Figure S16.</b> $^1\text{H}$ NMR spectrum of <b>1d</b> in $\text{CDCl}_3$ at 298 K.                                                                                                                                                                                                                                                                                                  | 16    |
| <b>Figure S17.</b> $^1\text{H}$ NMR spectrum of <b>4</b> in $\text{CDCl}_3$ at 298 K.                                                                                                                                                                                                                                                                                                   | 17    |
| <b>Figure S18.</b> $^1\text{H}$ NMR spectrum of <b>4d</b> in $\text{CDCl}_3$ at 298 K.                                                                                                                                                                                                                                                                                                  | 18    |
| <b>Figure S19.</b> $^1\text{H}$ NMR spectrum of <b>5</b> in $\text{CDCl}_3$ at 298 K.                                                                                                                                                                                                                                                                                                   | 19    |
| <b>Figure S20.</b> $^1\text{H}$ NMR spectrum of <b>5d</b> in $\text{CDCl}_3$ at 298 K.                                                                                                                                                                                                                                                                                                  | 20    |
| <b>Figure S21.</b> $^1\text{H}$ NMR spectrum of <b>3</b> in $\text{CDCl}_3$ at 298 K.                                                                                                                                                                                                                                                                                                   | 21    |
| <b>Figure S22.</b> $^1\text{H}$ NMR spectrum of <b>3d</b> in $\text{CDCl}_3$ at 298 K.                                                                                                                                                                                                                                                                                                  | 22    |
| <b>Figure S23.</b> $^1\text{H}$ NMR spectrum of <b>2</b> in $\text{CDCl}_3$ at 298 K.                                                                                                                                                                                                                                                                                                   | 23    |
| <b>Figure S24.</b> $^1\text{H}$ NMR spectrum of <b>2d</b> in $\text{CDCl}_3$ at 298 K.                                                                                                                                                                                                                                                                                                  | 24    |
| <b>Figure S25.</b> Cyclic voltammograms of (a) $\text{H}_2\text{TPP}(\text{X})\text{Y}_2$ , (b) $\text{ZnTPP}(\text{X})\text{Y}_2$ (c) $\text{CoTPP}(\text{X})\text{Y}_2$ (d) $\text{NiTPP}(\text{X})\text{Y}_2$ (where $\text{X} = \text{CHO}, \text{COOH}, \text{CH}_2\text{OH}$ and $\text{Y} = \text{H}, \text{Br}, \text{Ph}$ ) complexes in $\text{CH}_2\text{Cl}_2$ .            | 25    |
| <b>Figure S26.</b> Cyclic voltammograms of (a) $\text{MTPP}(\text{CHO})$ , (b) $\text{MTPP}(\text{CHO})\text{Br}_2$ , (c) $\text{MTPP}(\text{CHO})(\text{Ph})_2$ (d) $\text{MTPP}(\text{COOH})$ , (e) $\text{MTPP}(\text{CH}_2\text{OH})$ (where $\text{M} = \text{2H}, \text{Zn}, \text{Cu}, \text{Co}, \text{Ni}$ ) complexes in $\text{CH}_2\text{Cl}_2$ .                           | 26-27 |
| <b>Figure S27.</b> The HOMO-LUMO variation of various Mixed $\beta$ -substituted porphyrins:<br>(a) $\text{H}_2\text{TPP}(\text{X})\text{Y}_2$ (b) $\text{ZnTPP}(\text{X})\text{Y}_2$ (c) $\text{CoTPP}(\text{X})\text{Y}_2$ (d) $\text{NiTPP}(\text{X})\text{Y}_2$ (where $\text{X} = \text{CHO}, \text{COOH}, \text{CH}_2\text{OH}$ and $\text{Y} = \text{H}, \text{Br}, \text{Ph}$ ) | 28-31 |
| <b>Table S1.</b> Selected bond lengths ( $\text{\AA}$ ) and bond angles (deg) for the B3LYP/6-311g(d,p) optimised geometries of $\text{H}_2\text{TPP}(\text{X})\text{Y}_2$ ( $\text{X} = \text{CHO}, \text{CH}_2\text{OH}$ and $\text{COOH}$ , $\text{Y} = \text{Br}$ and $\text{Ph}$ ).                                                                                                | 6     |
| <b>Table S2.</b> UV-Vis spectral data of $\text{Cu}(\text{II})$ , $\text{Co}(\text{II})$ and $\text{Ni}(\text{II})$ complexes of $\beta$ -mono- and tri-substituted porphyrins in $\text{CH}_2\text{Cl}_2$ at 298 K.                                                                                                                                                                    | 10    |
| <b>Table S3.</b> Fluorescence Spectral data of mono/tri- $\beta$ -substituted porphyrins in $\text{CH}_2\text{Cl}_2$ at 298 K.                                                                                                                                                                                                                                                          | 14    |
| <b>Table S4.</b> Modulation of frontier and subfrontier orbitals of $\text{CuTPP}(\text{X})\text{Y}_2$ w.r.t $\text{CuTPP}$ .                                                                                                                                                                                                                                                           | 32    |
| <b>Table S5.</b> Modulation of frontier and subfrontier orbitals of $\text{ZnTPP}(\text{X})\text{Y}_2$ w.r.t $\text{ZnTPP}$ .                                                                                                                                                                                                                                                           | 32    |
| <b>Table S6.</b> Modulation of frontier and subfrontier orbitals of $\text{CoTPP}(\text{X})\text{Y}_2$ w.r.t $\text{CoTPP}$ .                                                                                                                                                                                                                                                           | 33    |

CoTPP.

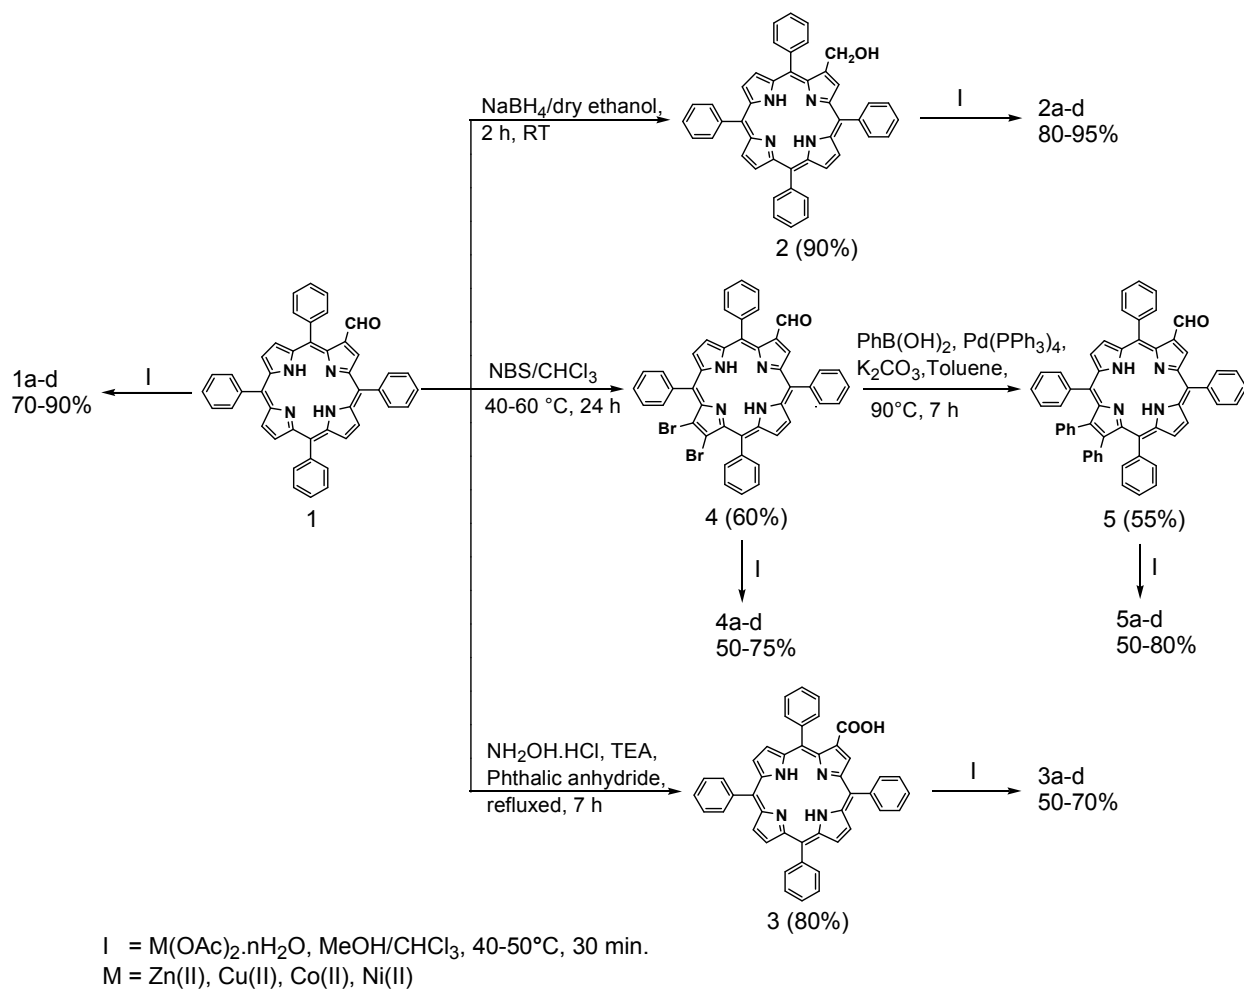

**Scheme S1.** Synthetic scheme for MTPP(X)Y<sub>2</sub>.

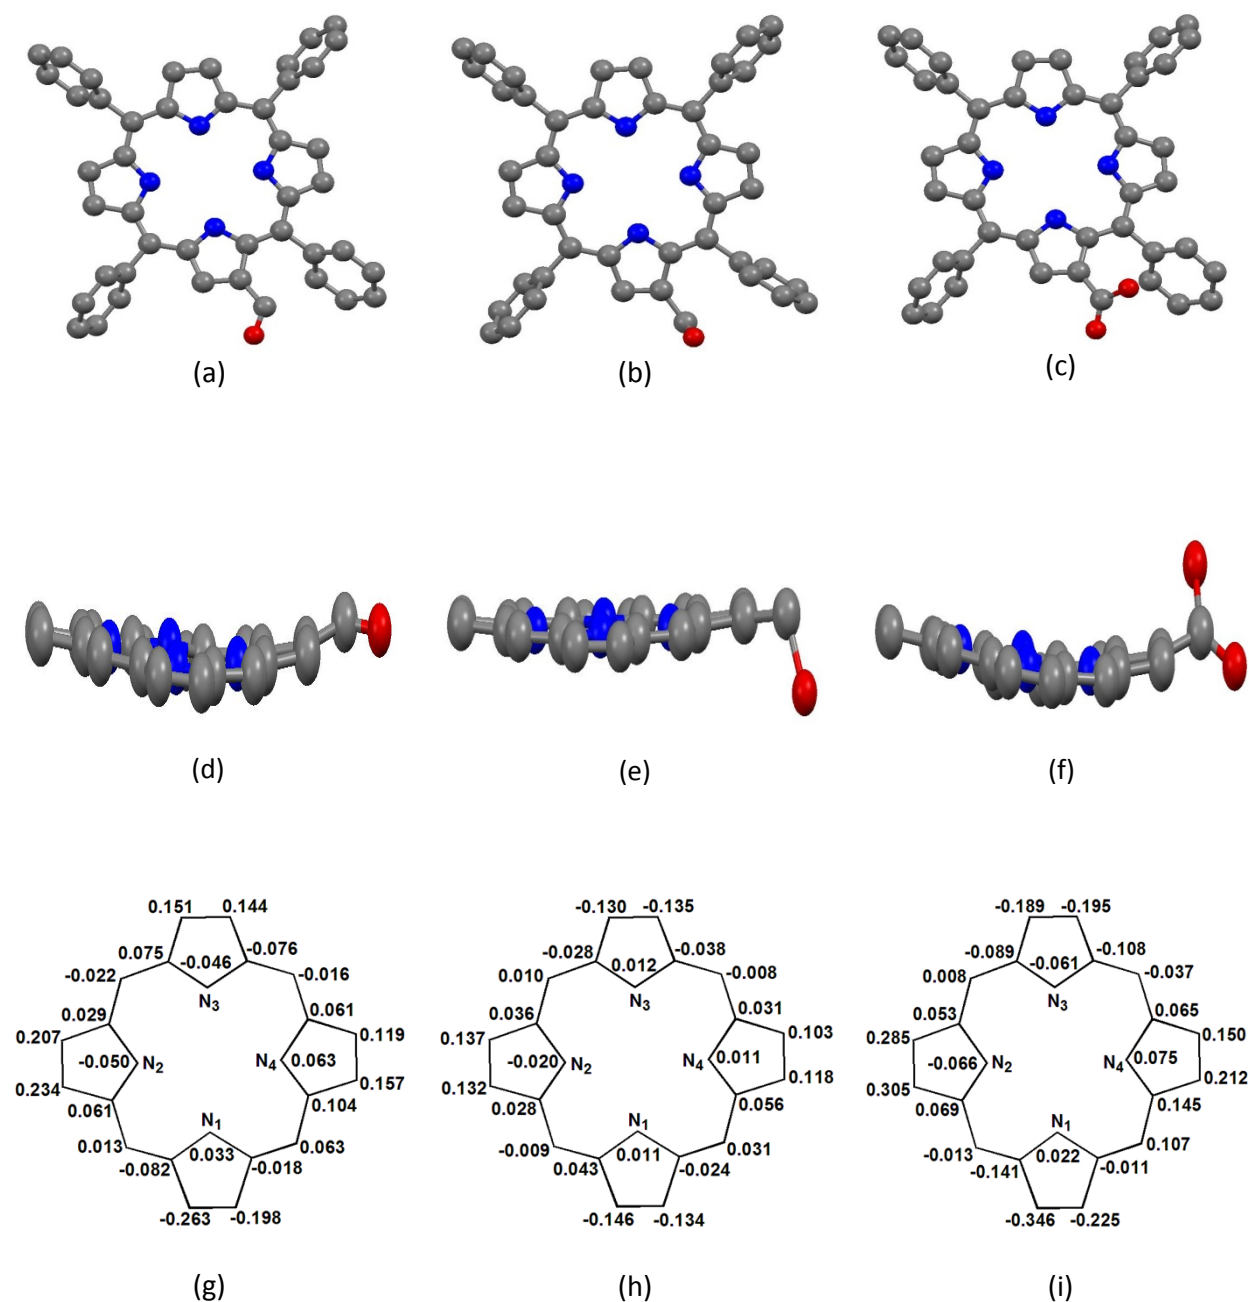

**Figure S1.** B3LYP/ 6-311g(d,p) optimised geometries showing top as well as side views of  $\text{H}_2\text{TPP}(\text{CHO})$  (a and d),  $\text{H}_2\text{TPP}(\text{CH}_2\text{OH})$  (b and e) and  $\text{H}_2\text{TPP}(\text{COOH})$  (c and f), respectively. In side view, the  $\beta$ -substituents and *meso*-phenyl groups are not shown for clarity. The displacement of porphyrin-core atoms in Å from the mean plane are shown in figures g, h and i for  $\text{H}_2\text{TPP}(\text{CHO})$ ,  $\text{H}_2\text{TPP}(\text{CH}_2\text{OH})$  and  $\text{H}_2\text{TPP}(\text{COOH})$  respectively. Color codes for atoms: C (grey), N (blue) and O (red).

**Table S1.** Selected bond lengths (Å) and bond angles (deg) for the B3LYP/6-311g(d,p) optimised geometries of H<sub>2</sub>TPP(X)Y<sub>2</sub> (X = CHO, CH<sub>2</sub>OH and COOH, Y = Br and Ph).

|                                                   | H <sub>2</sub> TPP(CHO) | H <sub>2</sub> TPP(CH <sub>2</sub> OH) | H <sub>2</sub> TPP(COOH) | H <sub>2</sub> TPP(CHO)Br <sub>2</sub> | H <sub>2</sub> TPP(CHO)(Ph) <sub>2</sub> |
|---------------------------------------------------|-------------------------|----------------------------------------|--------------------------|----------------------------------------|------------------------------------------|
| <b>Bond Length (Å)</b>                            |                         |                                        |                          |                                        |                                          |
| N-C <sub>α</sub>                                  | 1.363                   | 1.364                                  | 1.363                    | 1.363                                  | 1.362                                    |
| N'-C <sub>α'</sub>                                | 1.374                   | 1.374                                  | 1.374                    | 1.375                                  | 1.375                                    |
| C <sub>α</sub> -C <sub>β</sub>                    | 1.461                   | 1.461                                  | 1.460                    | 1.462                                  | 1.465                                    |
| C <sub>α'</sub> -C <sub>β'</sub>                  | 1.433                   | 1.433                                  | 1.434                    | 1.433                                  | 1.433                                    |
| <b>C<sub>β</sub>-C<sub>β</sub></b>                | <b>1.357</b>            | <b>1.353</b>                           | <b>1.358</b>             | <b>1.363</b>                           | <b>1.366</b>                             |
| C <sub>β'</sub> -C <sub>β'</sub>                  | 1.366                   | 1.366                                  | 1.366                    | 1.365                                  | 1.366                                    |
| C <sub>α</sub> -C <sub>m</sub>                    | 1.410                   | 1.409                                  | 1.410                    | 1.414                                  | 1.414                                    |
| C <sub>α'</sub> -C <sub>m</sub>                   | 1.401                   | 1.402                                  | 1.402                    | 1.403                                  | 1.403                                    |
| <b>ΔC<sub>β</sub> (Å)<sup>a</sup></b>             | <b>0.184</b>            | <b>0.129</b>                           | <b>0.238</b>             | <b>0.575</b>                           | <b>0.578</b>                             |
| <b>Δ24 (Å)<sup>b</sup></b>                        | <b>0.095</b>            | <b>0.059</b>                           | <b>0.123</b>             | <b>0.266</b>                           | <b>0.256</b>                             |
| <b>Bond Angle (deg)</b>                           |                         |                                        |                          |                                        |                                          |
| <b>N-C<sub>α</sub>-C<sub>m</sub></b>              | <b>125.78</b>           | <b>125.59</b>                          | <b>125.83</b>            | <b>124.52</b>                          | <b>124.49</b>                            |
| N'-C <sub>α'</sub> -C <sub>m</sub>                | 126.94                  | 127.06                                 | 127.00                   | 127.19                                 | 126.81                                   |
| N-C <sub>α</sub> -C <sub>β</sub>                  | 110.64                  | 110.62                                 | 110.54                   | 109.91                                 | 110.59                                   |
| N'-C <sub>α'</sub> -C <sub>β'</sub>               | 106.45                  | 106.43                                 | 106.43                   | 106.29                                 | 106.28                                   |
| <b>C<sub>β</sub>-C<sub>α</sub>-C<sub>m</sub></b>  | <b>123.54</b>           | <b>123.74</b>                          | <b>123.52</b>            | <b>125.47</b>                          | <b>124.98</b>                            |
| C <sub>β'</sub> -C <sub>α'</sub> -C <sub>m</sub>  | 126.58                  | 126.49                                 | 126.68                   | 126.46                                 | 126.70                                   |
| C <sub>α</sub> -C <sub>β</sub> -C <sub>β</sub>    | 106.34                  | 106.38                                 | 106.38                   | 106.46                                 | 106.73                                   |
| C <sub>α'</sub> -C <sub>β'</sub> -C <sub>β'</sub> | 108.19                  | 108.20                                 | 108.20                   | 108.26                                 | 108.26                                   |
| C <sub>α</sub> -N-C <sub>α</sub>                  | 105.99                  | 105.80                                 | 106.08                   | 107.00                                 | 106.32                                   |
| C <sub>α'</sub> -N-C <sub>α'</sub>                | 110.69                  | 110.72                                 | 110.71                   | 110.83                                 | 110.88                                   |
| C <sub>α</sub> -C <sub>m</sub> -C <sub>α'</sub>   | 125.36                  | 125.66                                 | 125.18                   | 124.73                                 | 124.70                                   |

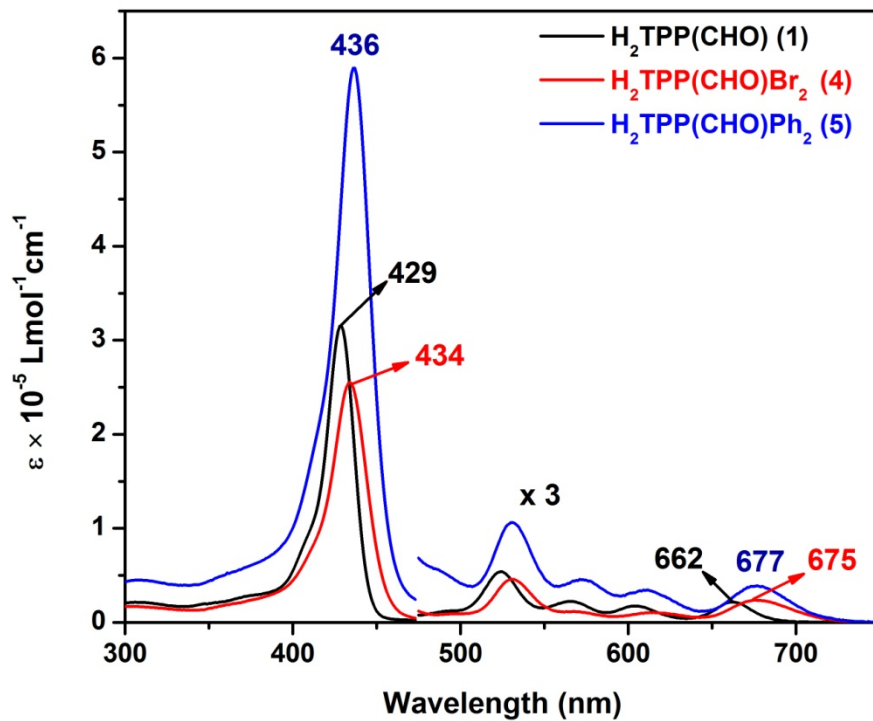

Figure S2. UV-Visible spectra of **1**, **4** and **5** in  $\text{CH}_2\text{Cl}_2$  at 298 K.

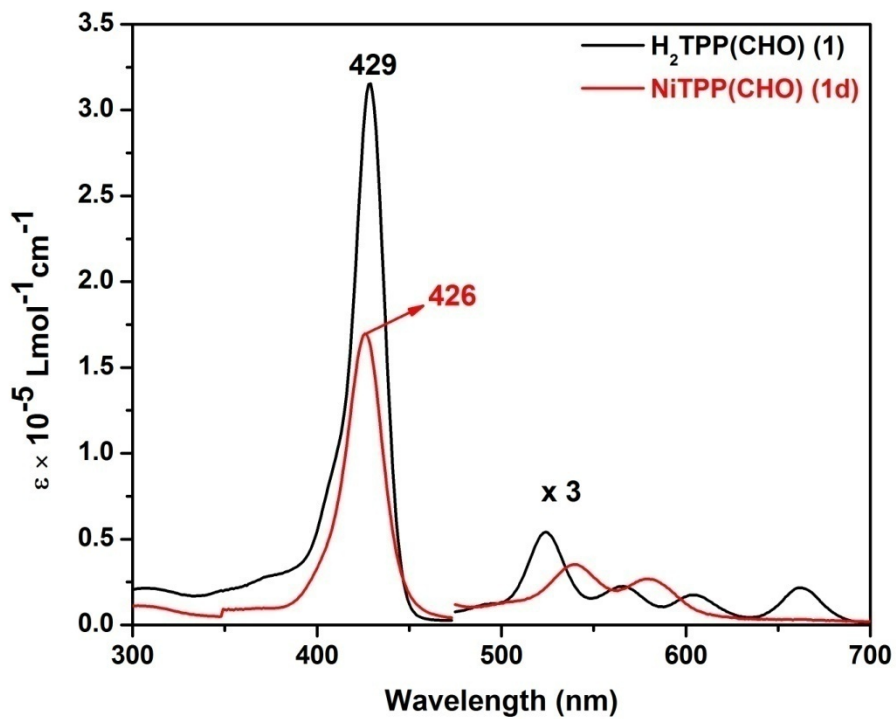

Figure S3. UV-Visible spectra of **1** and **1d** in  $\text{CH}_2\text{Cl}_2$  at 298 K.

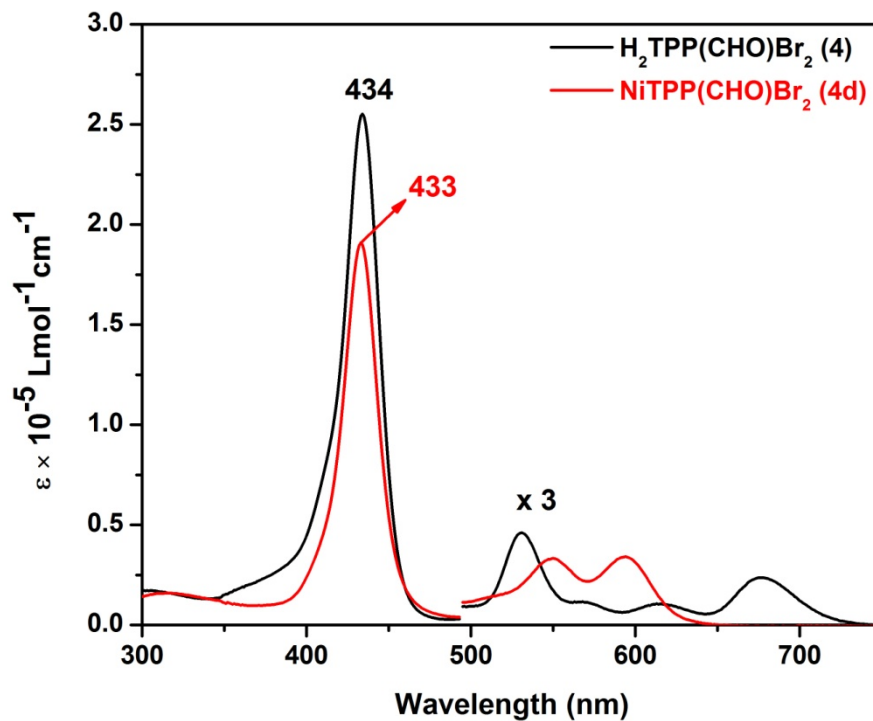

Figure S4. UV-Visible spectra of **4** and **4d** in  $\text{CH}_2\text{Cl}_2$  at 298 K.

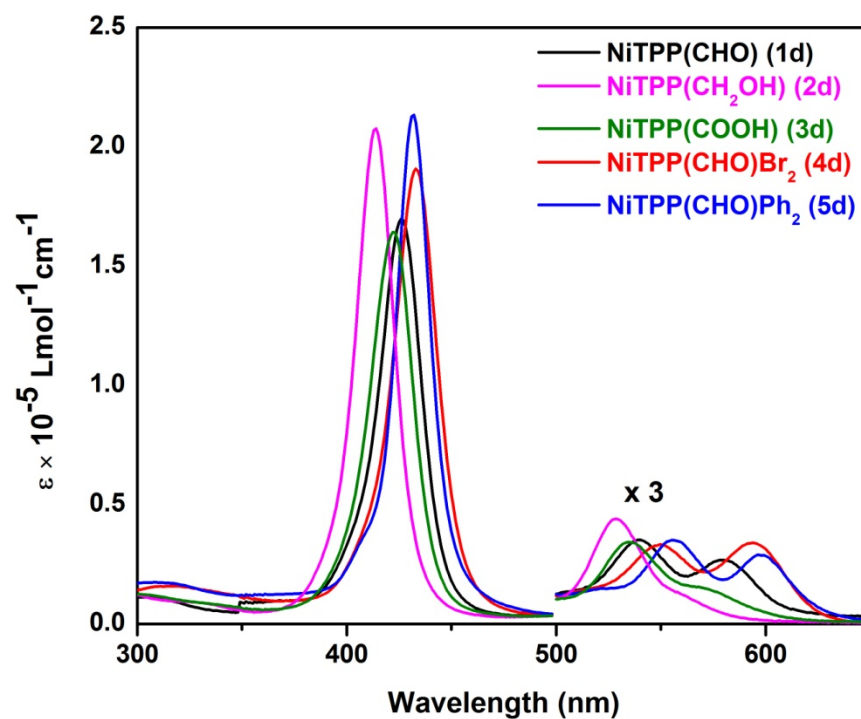

Figure S5. UV-Visible spectra of **1d** - **5d** in  $\text{CH}_2\text{Cl}_2$  at 298 K.



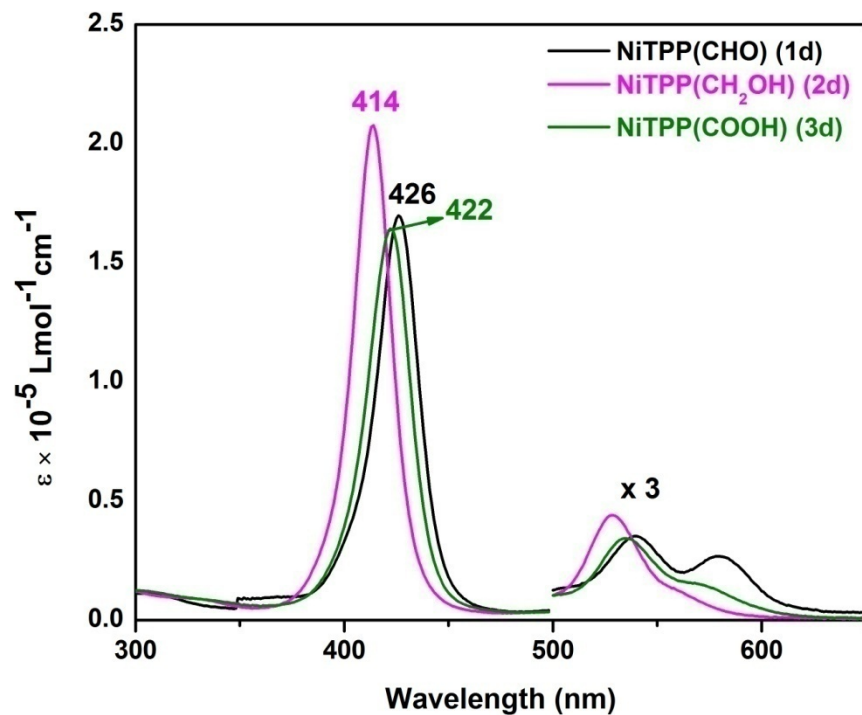

Figure S6. UV-Visible spectra of **1d** - **3d** in CH<sub>2</sub>Cl<sub>2</sub> at 298 K.

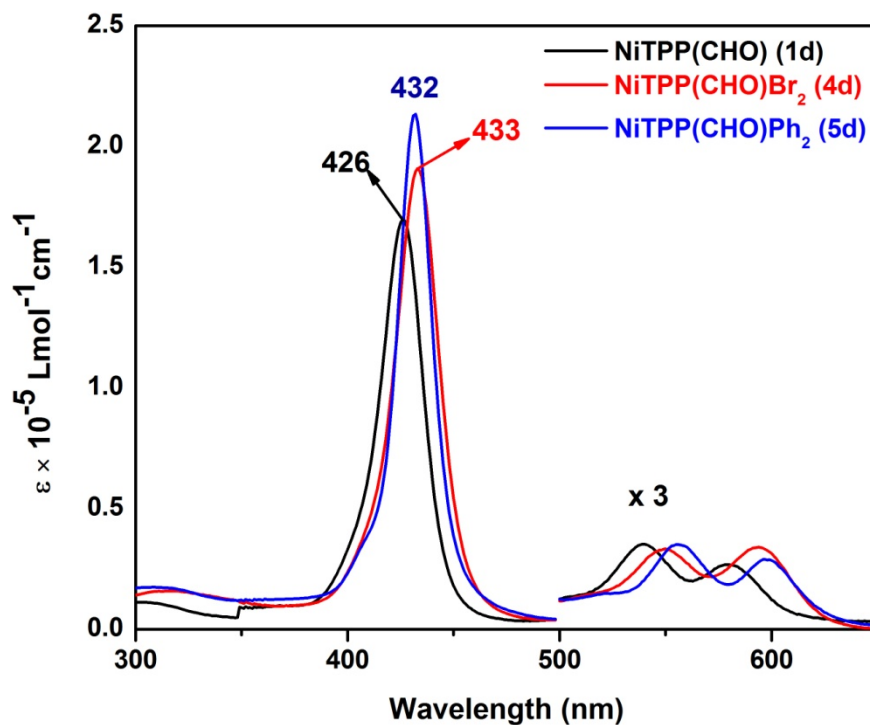

Figure S7. UV-Visible spectra of **1d**, **4d** and **5d** in CH<sub>2</sub>Cl<sub>2</sub> at 298 K.

**Table S2.** UV-Vis spectral data of Cu(II), Co(II) and Ni(II) complexes of  $\beta$ -mono- and trisubstituted porphyrins in CH<sub>2</sub>Cl<sub>2</sub> at 298 K.

| <b>Porphyrin</b>                           | <b>B band,<br/><math>\lambda_{\max}</math>,nm</b> | <b>Q bands,<br/><math>\lambda_{\max}</math>, nm</b> |
|--------------------------------------------|---------------------------------------------------|-----------------------------------------------------|
| CuTPP(CHO) ( <b>1b</b> )                   | 426(5.33)                                         | 549(3.97),591(3.79)                                 |
| CuTPP(CH <sub>2</sub> OH) ( <b>2b</b> )    | 414(5.59)                                         | 538(4.23)                                           |
| CuTPP(COOH) ( <b>3b</b> )                  | 421(5.48)                                         | 545(4.22),581(3.68)                                 |
| CuTPPBr <sub>2</sub> (CHO) ( <b>4b</b> )   | 430(5.31)                                         | 557(3.98),598(3.95)                                 |
| CuTPP(Ph <sub>2</sub> )(CHO) ( <b>5b</b> ) | 432(5.33)                                         | 556(4.04),597(3.97)                                 |
| CoTPP(CHO) ( <b>1c</b> )                   | 422(4.80)                                         | 539(3.51),577(3.38)                                 |
| CoTPP(CH <sub>2</sub> OH) ( <b>2c</b> )    | 409(5.38)                                         | 528(4.14)                                           |
| CoTPP(COOH) ( <b>3c</b> )                  | 416(5.23)                                         | 535(4.04)                                           |
| CoTPPBr <sub>2</sub> (CHO) ( <b>4c</b> )   | 428(5.18)                                         | 549(3.98),589(4.0)                                  |
| CoTPP(Ph <sub>2</sub> )(CHO) ( <b>5c</b> ) | 429(4.96)                                         | 550(3.81),587(3.80)                                 |
| NiTPP(CHO) ( <b>1d</b> )                   | 426(5.22)                                         | 540(4.06),580(3.94)                                 |
| NiTPP(CH <sub>2</sub> OH) ( <b>2d</b> )    | 414(5.31)                                         | 529(4.16)                                           |
| NiTPP(COOH) ( <b>3d</b> )                  | 422(5.21)                                         | 535(4.05),561(sh)                                   |
| NiTPPBr <sub>2</sub> (CHO) ( <b>4d</b> )   | 430(5.27)                                         | 550(4.03),594(4.04)                                 |
| NiTPP(Ph <sub>2</sub> )(CHO) ( <b>5d</b> ) | 432(5.32)                                         | 556(4.06),596(3.98)                                 |

<sup>a</sup>The values in parentheses refer to log $\epsilon$  values,  $\epsilon$  in dm<sup>3</sup>/mol/cm; Por = Porphyrin; sh = shoulder.

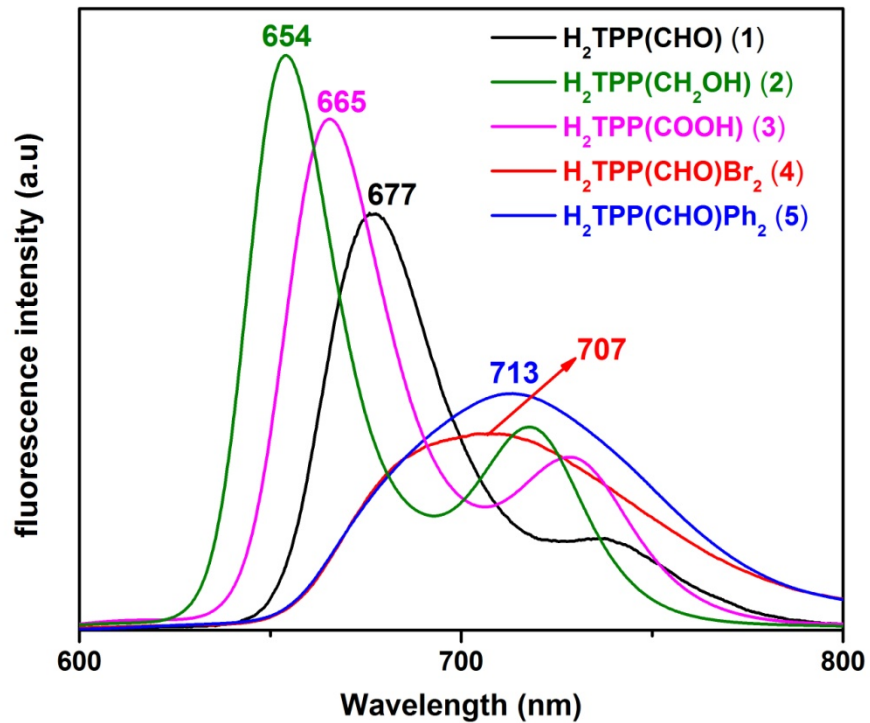

Figure S8. Fluorescence spectra of **1** - **5** in  $CH_2Cl_2$  at 298 K.

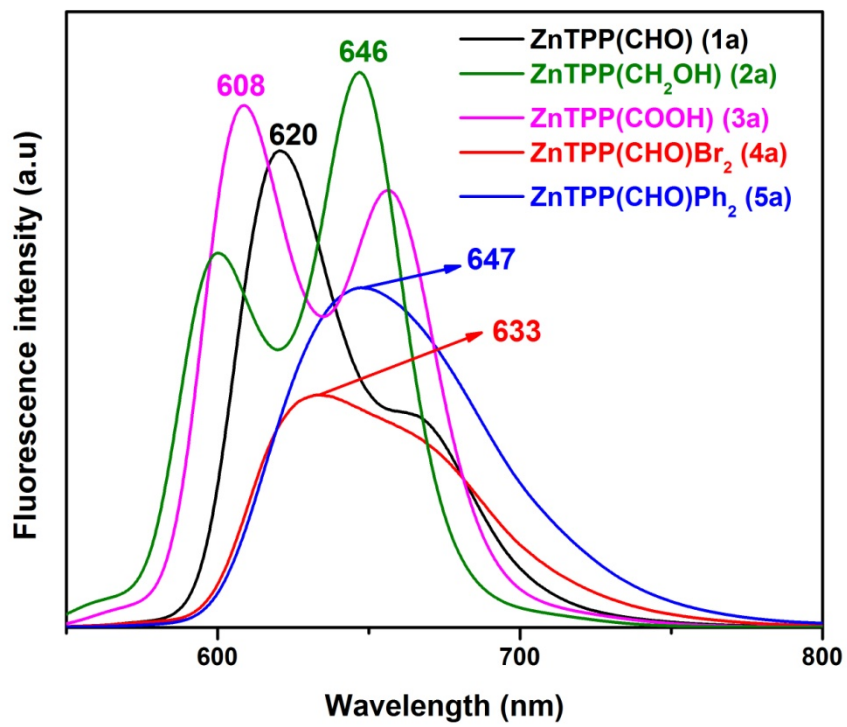

Figure S9. Fluorescence spectra of **1a** - **5a** in CH<sub>2</sub>Cl<sub>2</sub> at 298 K.

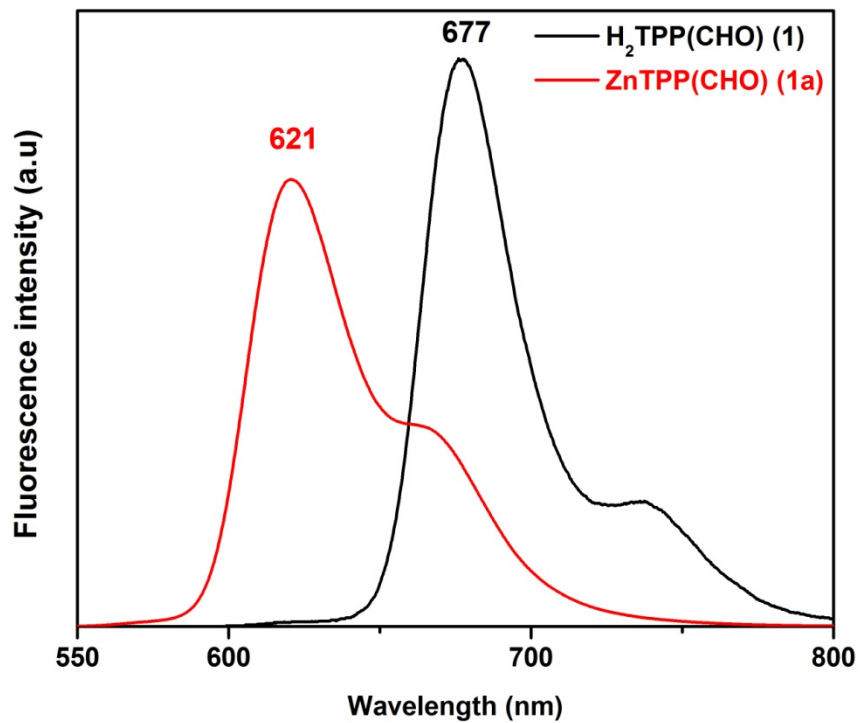

Figure S10. Fluorescence spectra of **1** and **1a** in CH<sub>2</sub>Cl<sub>2</sub> at 298 K.

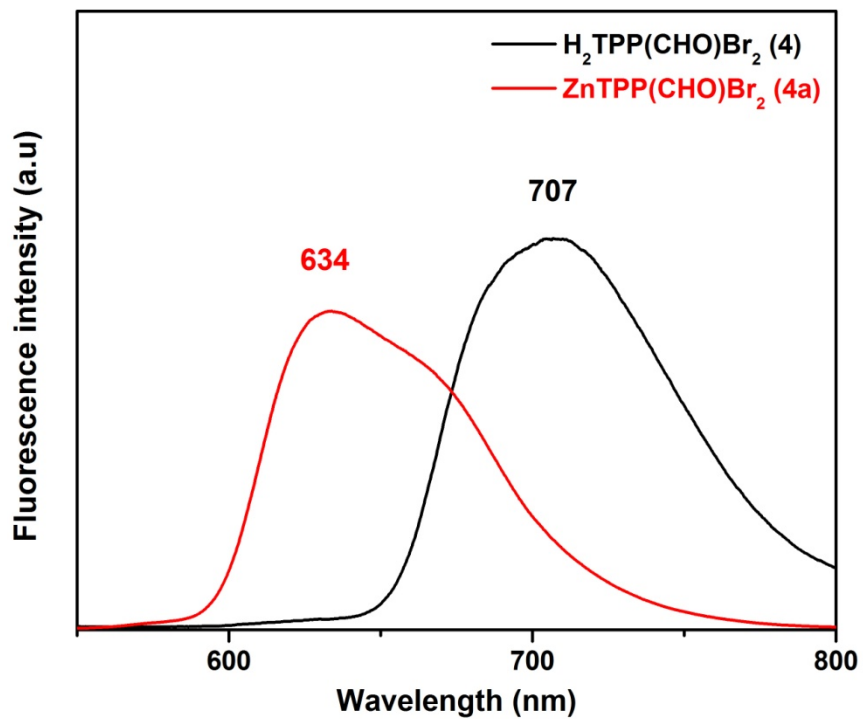

Figure S11. Fluorescence spectra of **4** and **4a** in CH<sub>2</sub>Cl<sub>2</sub> at 298 K.

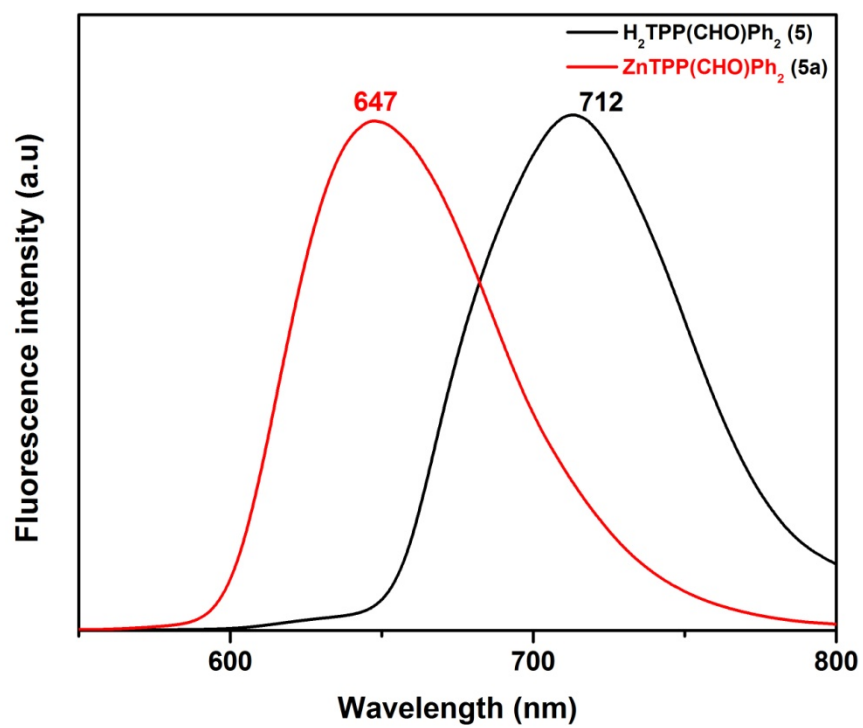

Figure S12. Fluorescence spectra of **5** and **5a** in CH<sub>2</sub>Cl<sub>2</sub> at 298 K.

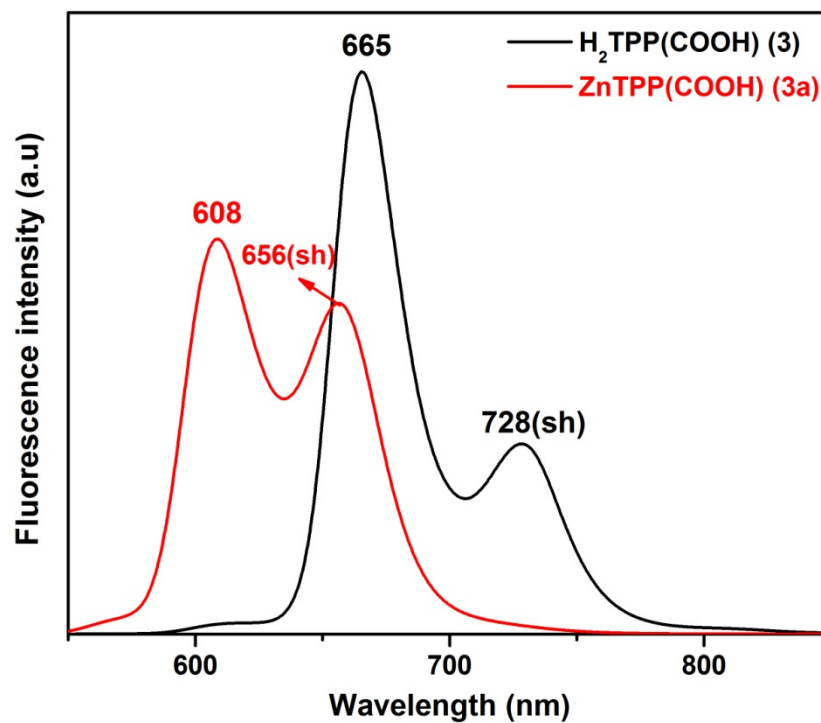

Figure S13. Fluorescence spectra of **3** and **3a** in CH<sub>2</sub>Cl<sub>2</sub> at 298 K.

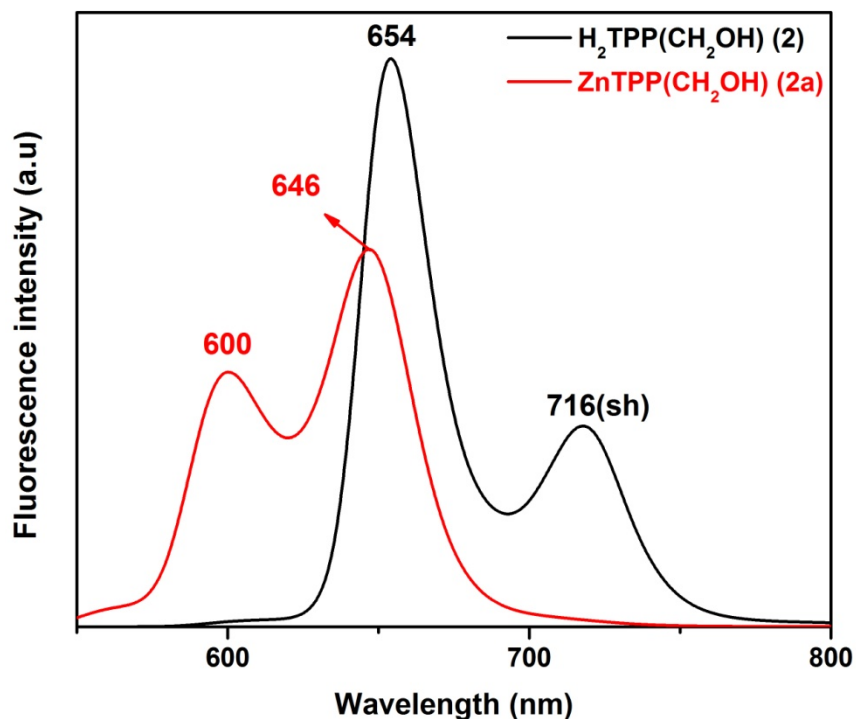

Figure S14. Fluorescence spectra of **2** and **2a** in CH<sub>2</sub>Cl<sub>2</sub> at 298 K.

Table S3. Fluorescence Spectral data of mono/tri- $\beta$ -substituted porphyrins in CH<sub>2</sub>Cl<sub>2</sub> at 298 K.

| Porphyrin | $\lambda_{\text{Ex}}$ nm | $\lambda_{\text{fl,max}}$ nm | Quantum Yield, $\phi_f^a$ | Stokes shift (nm) | Stokes shift (cm <sup>-1</sup> ) |
|-----------|--------------------------|------------------------------|---------------------------|-------------------|----------------------------------|
| <b>1</b>  | 429                      | 677                          | 0.1420 $\pm$ 0.0030       | 15                | 334                              |
| <b>2</b>  | 417                      | 654                          | 0.1132 $\pm$ 0.0020       | 9                 | 213                              |
| <b>3</b>  | 423                      | 665                          | 0.0913 $\pm$ 0.0021       | 13                | 300                              |
| <b>4</b>  | 434                      | 707                          | 0.0025 $\pm$ 0.0003       | 32                | 670                              |
| <b>5</b>  | 436                      | 713                          | 0.0560 $\pm$ 0.0018       | 36                | 746                              |
| <b>1a</b> | 430                      | 620                          | 0.0209 $\pm$ 0.0011       | 19                | 509                              |
| <b>2a</b> | 418                      | 606                          | 0.0266 $\pm$ 0.0013       | 53                | 1615                             |
| <b>3a</b> | 425                      | 608                          | 0.0279 $\pm$ 0.0009       | 16                | 444                              |
| <b>4a</b> | 434                      | 633                          | 0.0009 $\pm$ 0.00001      | 27                | 704                              |
| <b>5a</b> | 436                      | 647                          | 0.0091 $\pm$ 0.0004       | 41                | 1046                             |

<sup>a</sup> $\phi_f$  were calculated using literature method (E. Austin and M. Gouterman, *Bioinorg. Chem.* 1978, **9**, 281).

Fluorescence quantum yield are determined by the comparative method.<sup>1-2</sup>

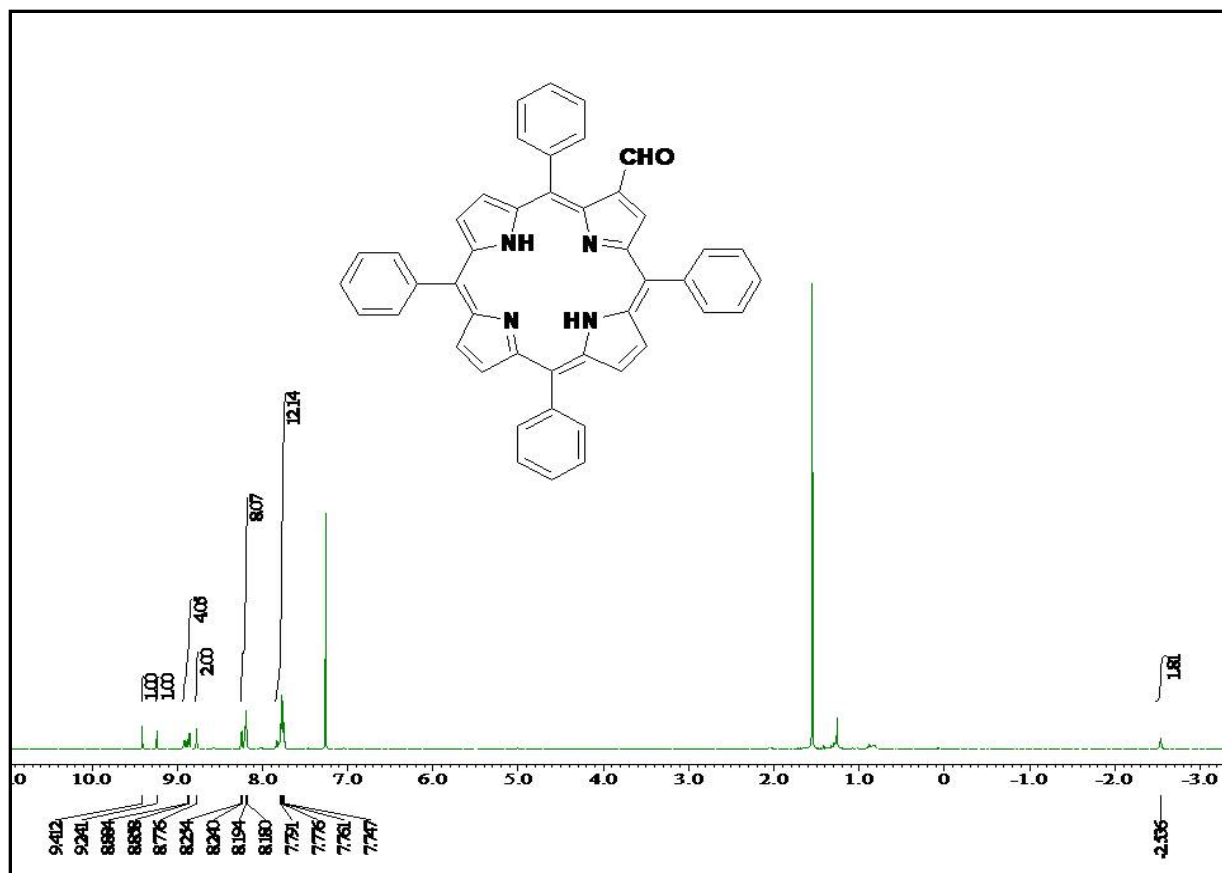

Figure S15. <sup>1</sup>H NMR spectrum of **1** in CDCl<sub>3</sub> at 298 K.

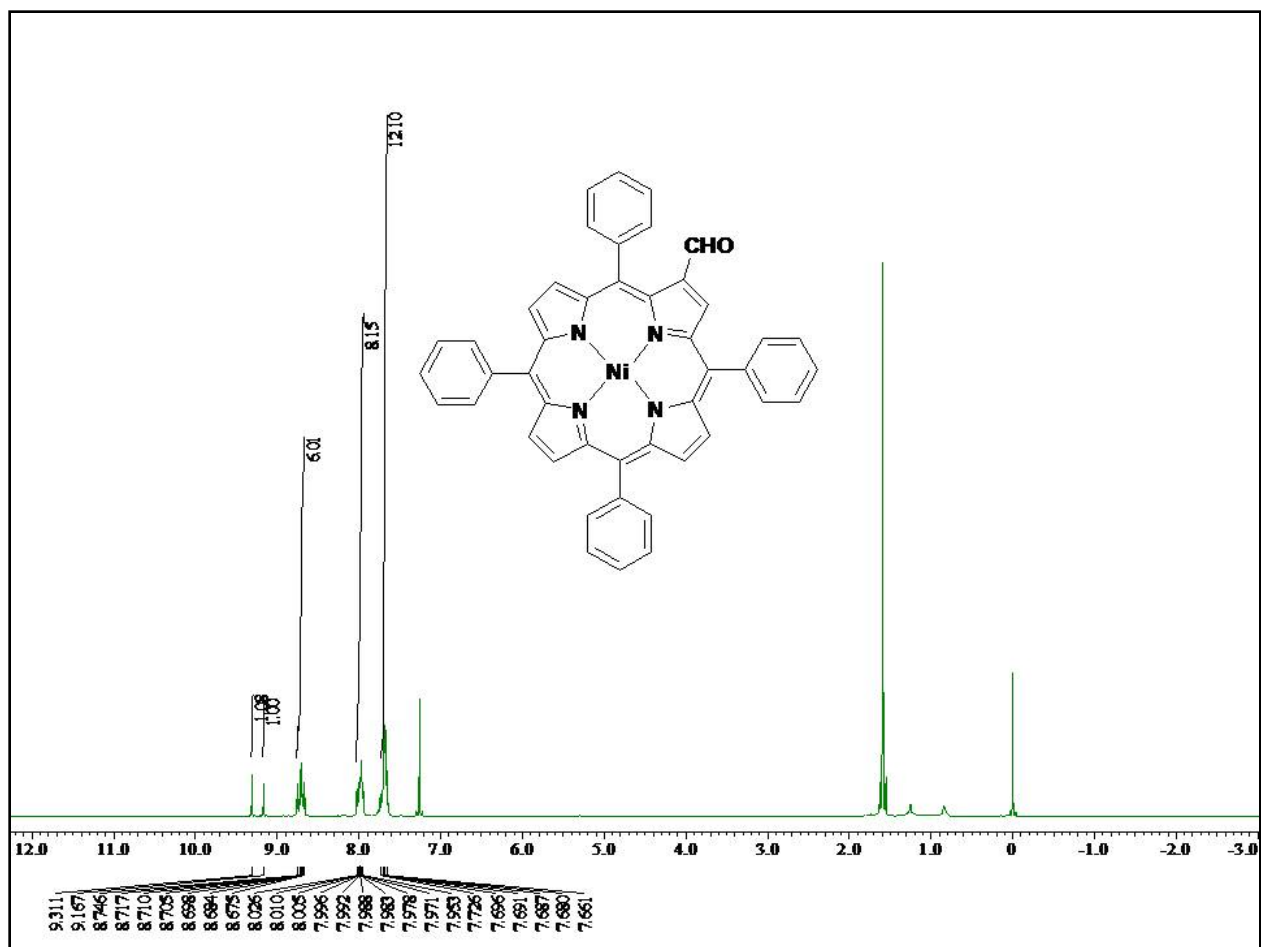

Figure S16. <sup>1</sup>H NMR spectrum of **1d** in CDCl<sub>3</sub> at 298 K.



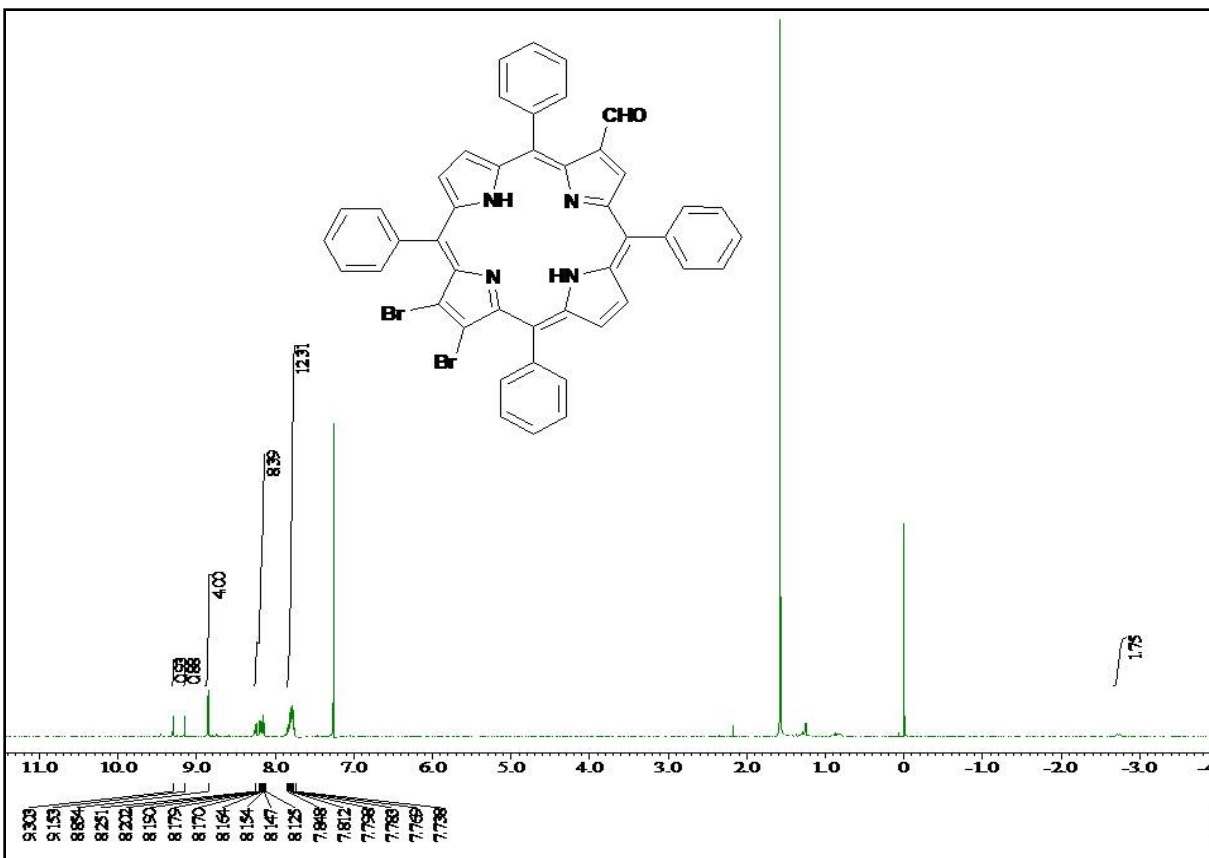

Figure S17. <sup>1</sup>H NMR spectrum of 4 in CDCl<sub>3</sub> at 298 K.

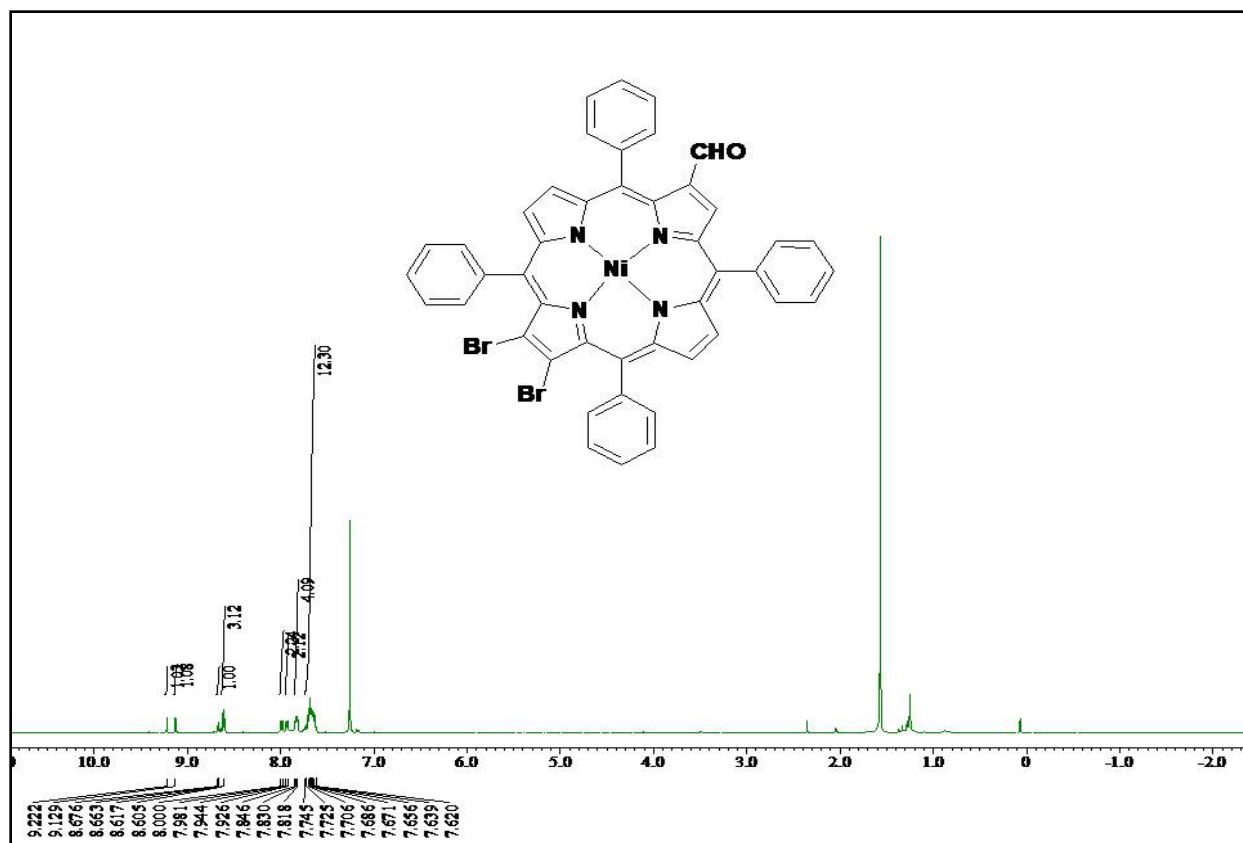

Figure S18.  $^1\text{H}$  NMR spectrum of **4d** in  $\text{CDCl}_3$  at 298 K.

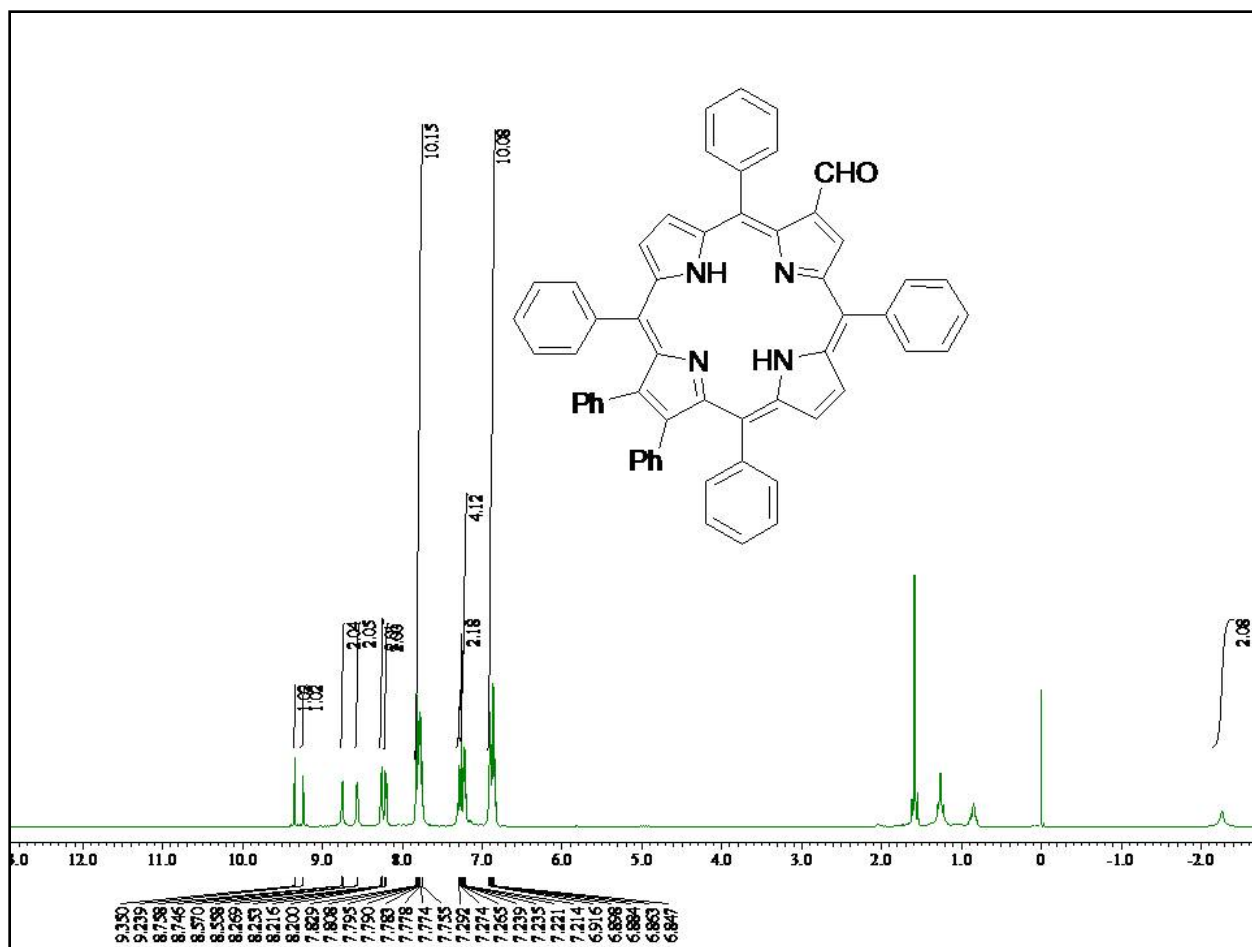

**Figure S19.**  $^1\text{H}$  NMR spectrum of **5** in  $\text{CDCl}_3$  at 298 K.

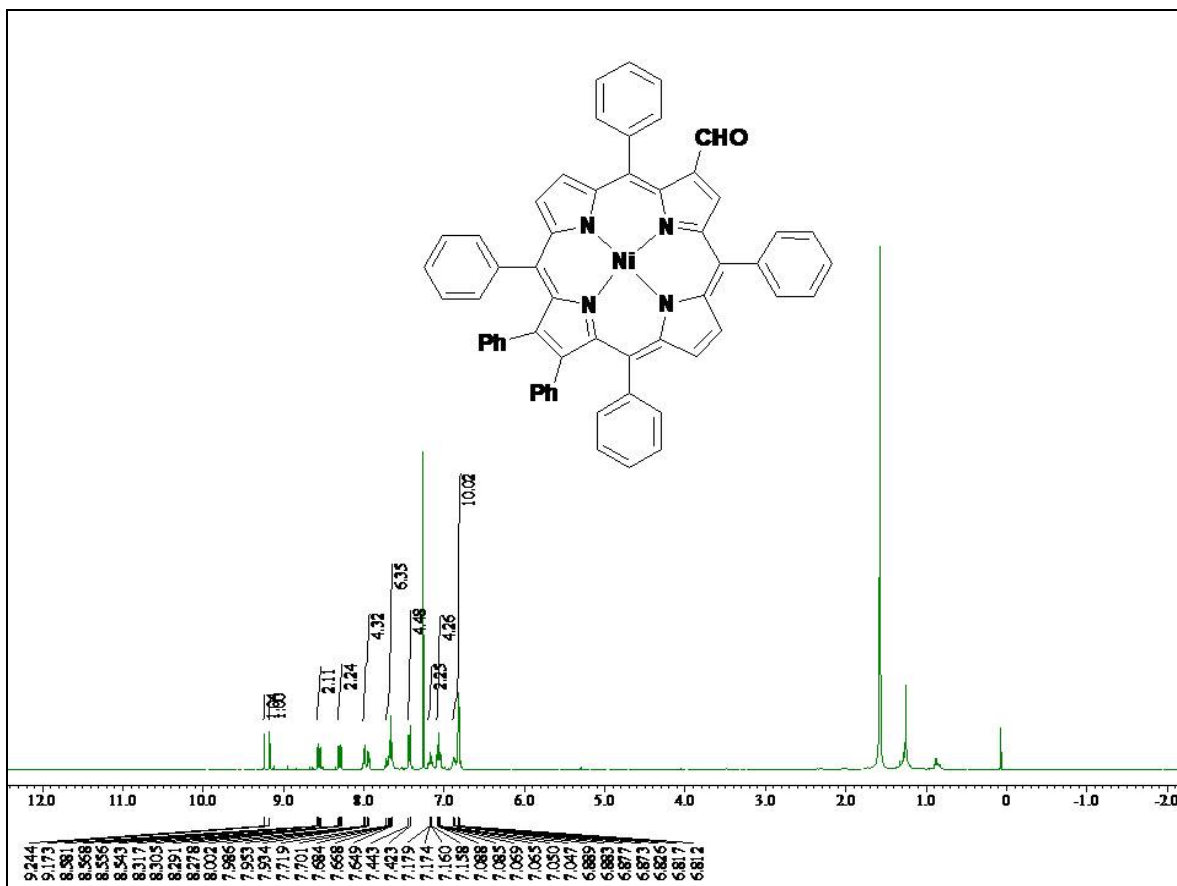

Figure S20. <sup>1</sup>H NMR spectrum of **5d** in CDCl<sub>3</sub> at 298 K.

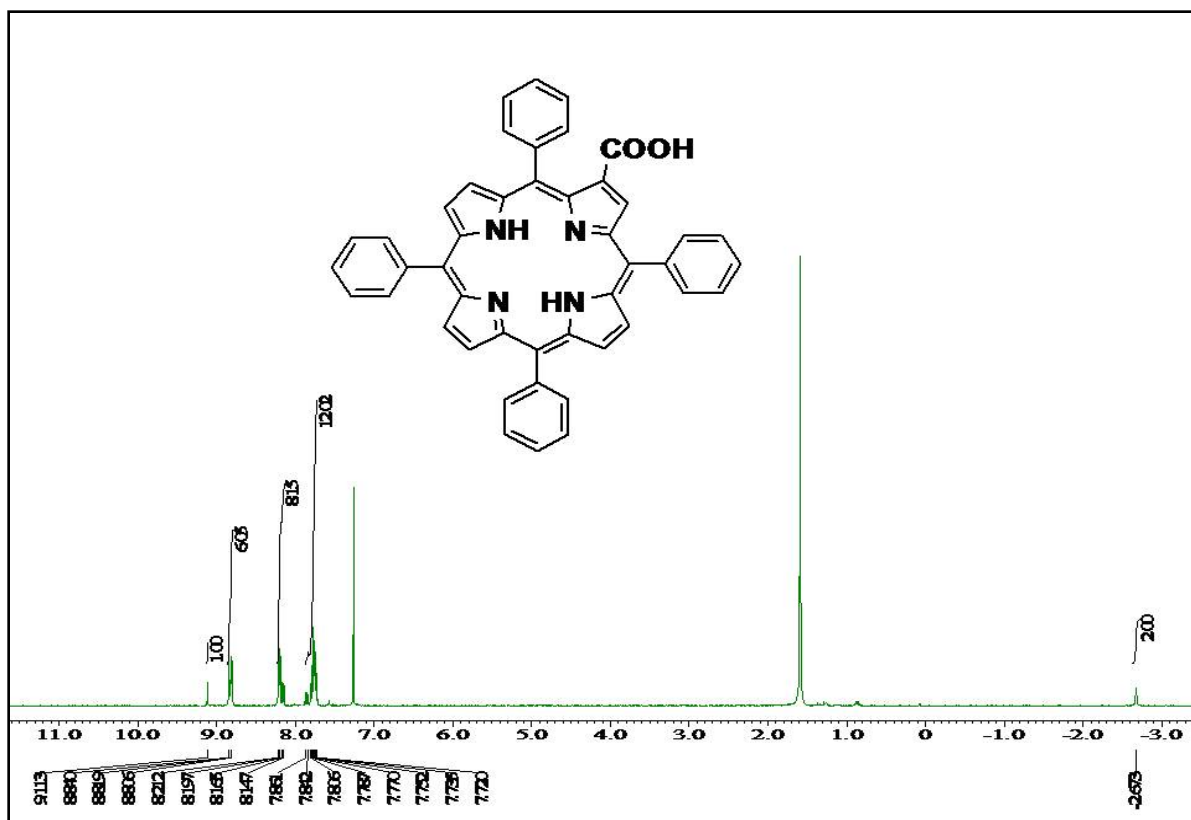

Figure S21. <sup>1</sup>H NMR spectrum of **3** in CDCl<sub>3</sub> at 298 K

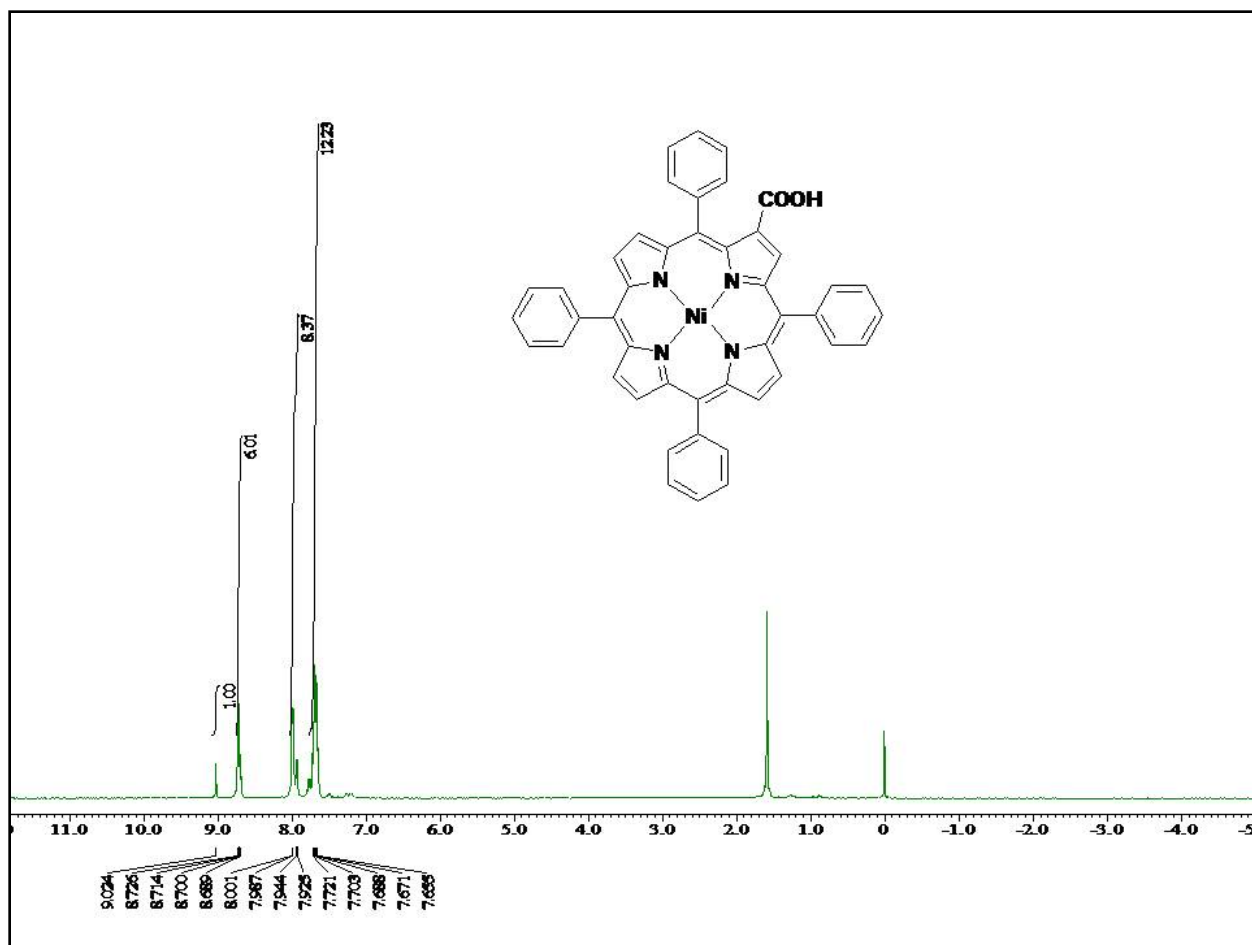

Figure S22. <sup>1</sup>H NMR spectrum of **3d** in CDCl<sub>3</sub> at 298 K.

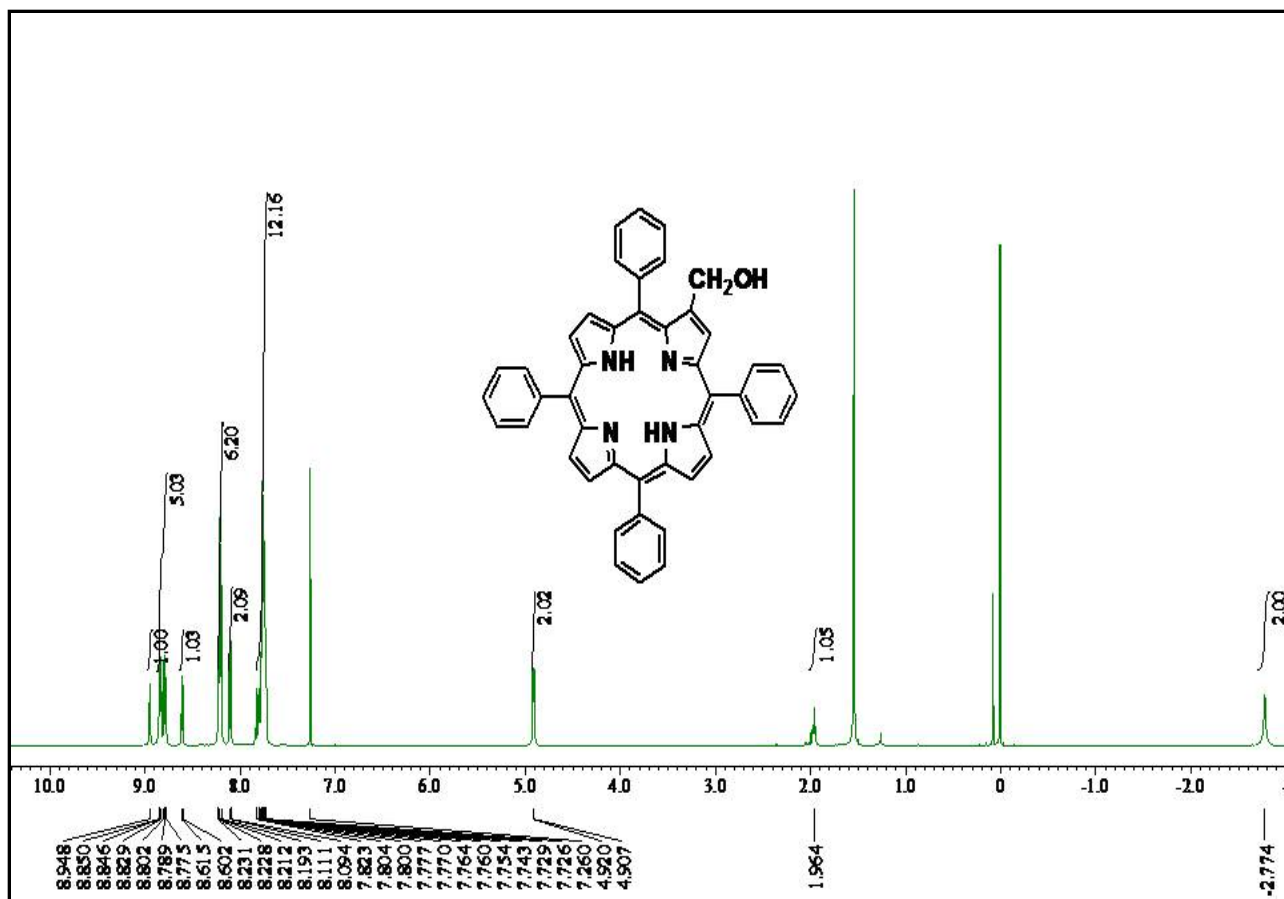

Figure S23.  $^1\text{H}$  NMR spectrum of **2** in  $\text{CDCl}_3$  at 298 K

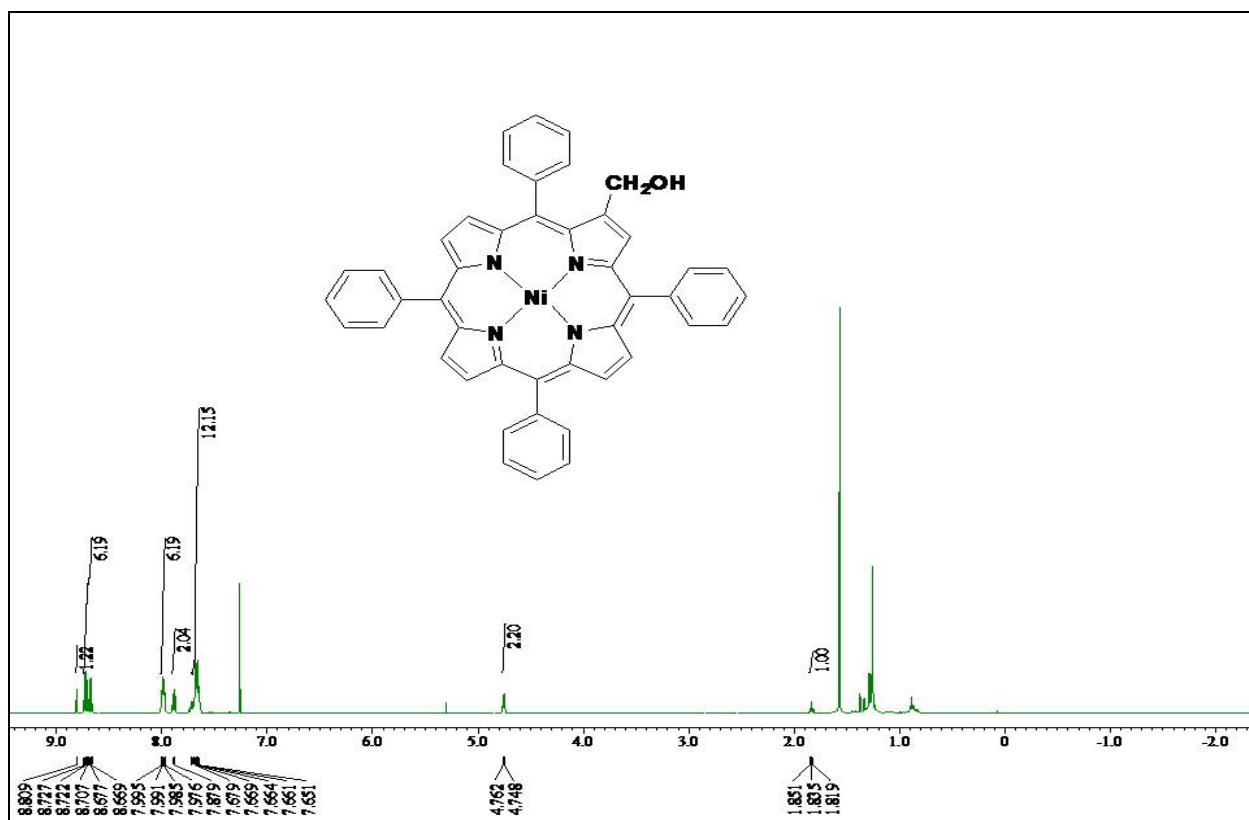

Figure S24.  $^1\text{H}$  NMR spectrum of **2d** in  $\text{CDCl}_3$  at 298 K.



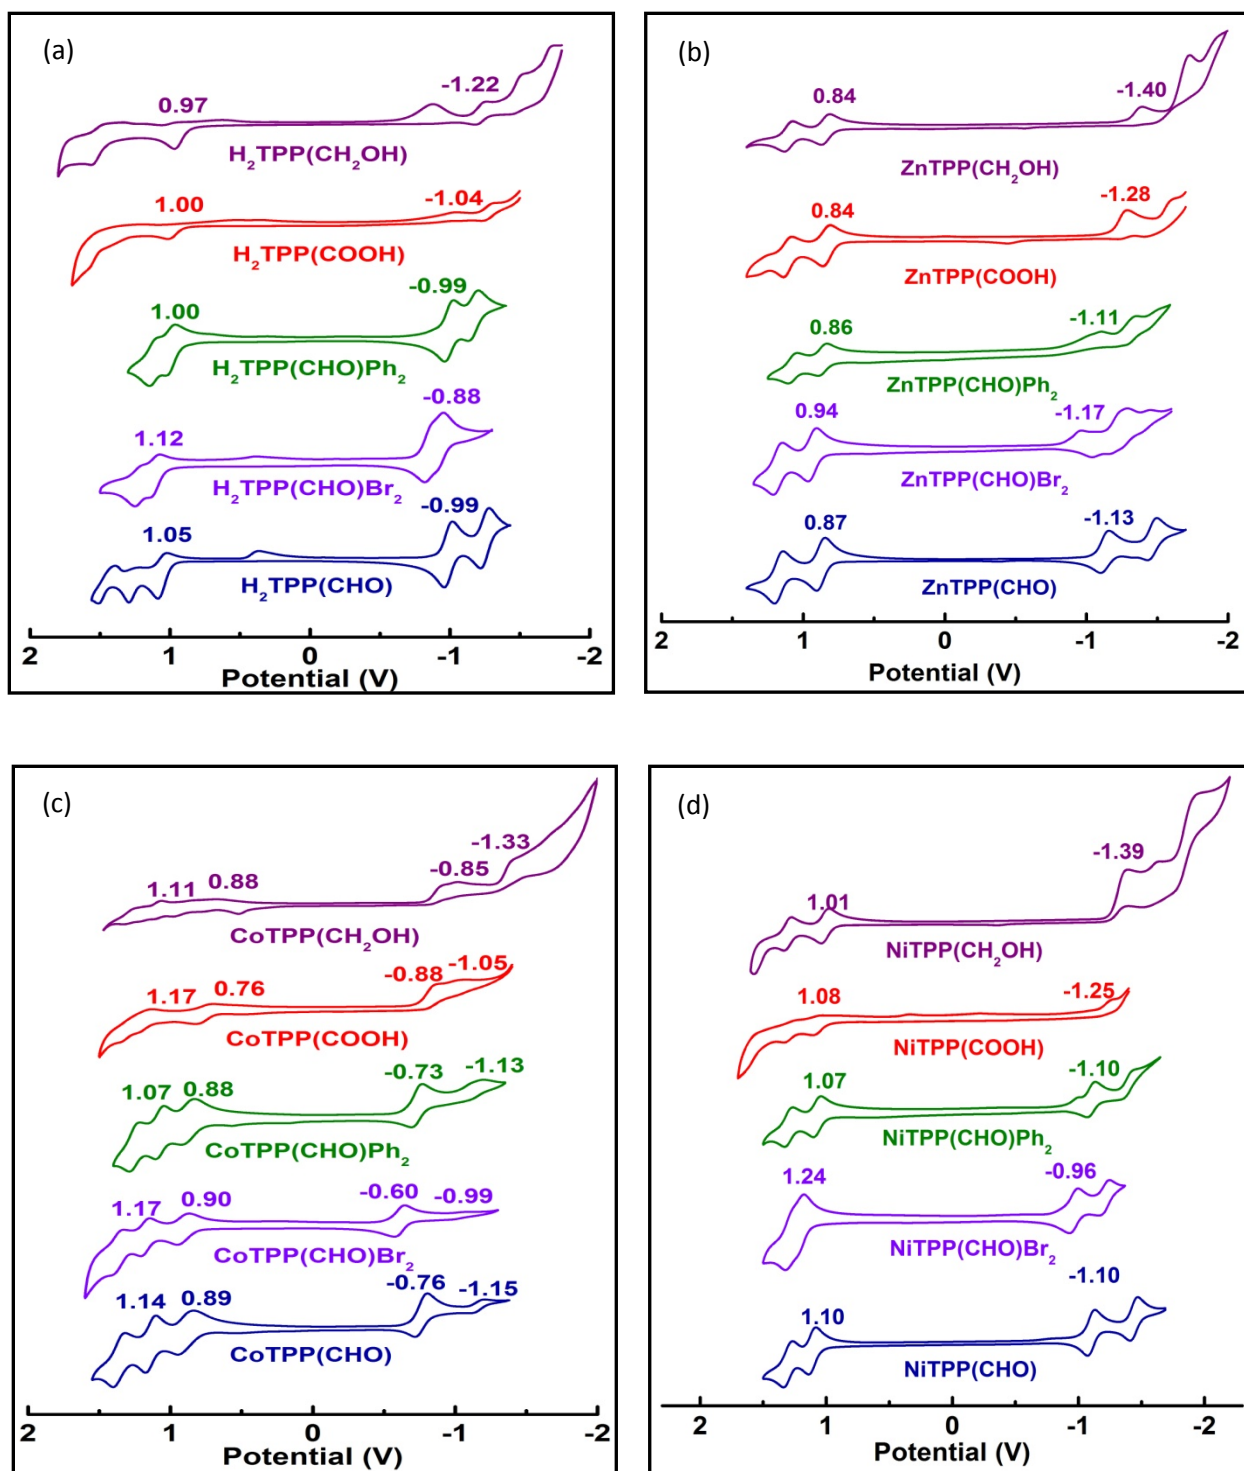

**Figure S25.** Cyclic voltammograms of (a)  $\text{H}_2\text{TPP}(\text{X})\text{Y}_2$ , (b)  $\text{ZnTPP}(\text{X})\text{Y}_2$  (c)  $\text{CoTPP}(\text{X})\text{Y}_2$  (d)  $\text{NiTPP}(\text{X})\text{Y}_2$  (where X = CHO, COOH,  $\text{CH}_2\text{OH}$  and Y = H, Br, Ph) complexes in  $\text{CH}_2\text{Cl}_2$ .

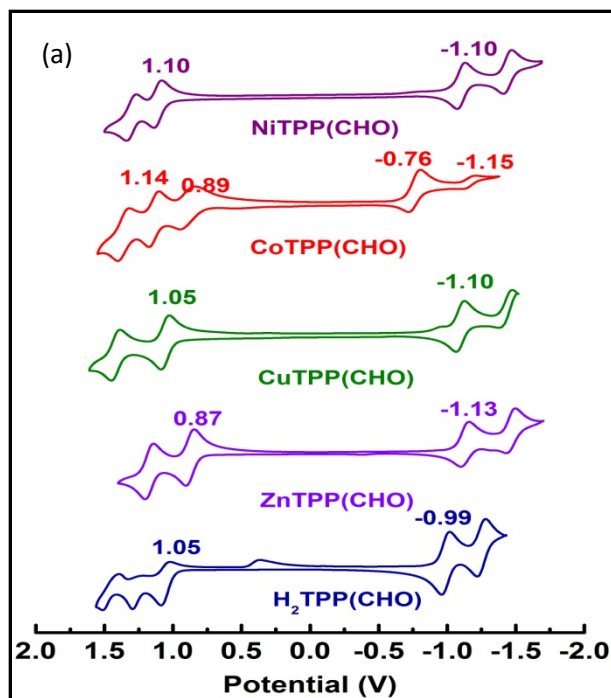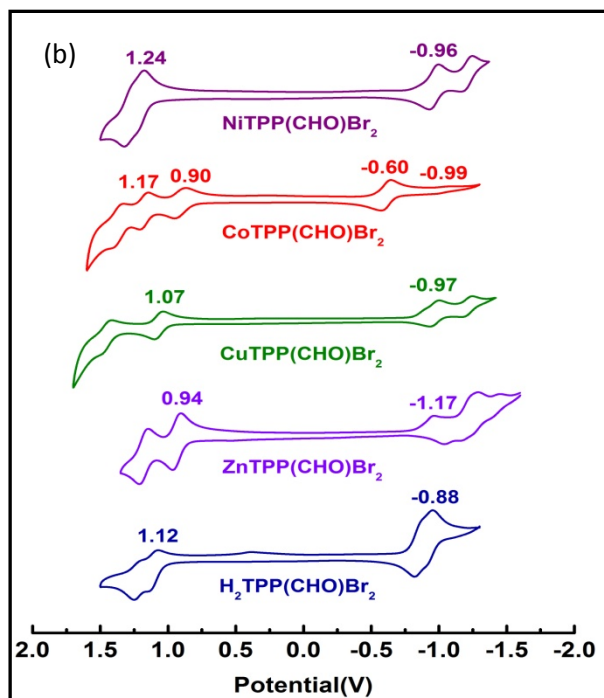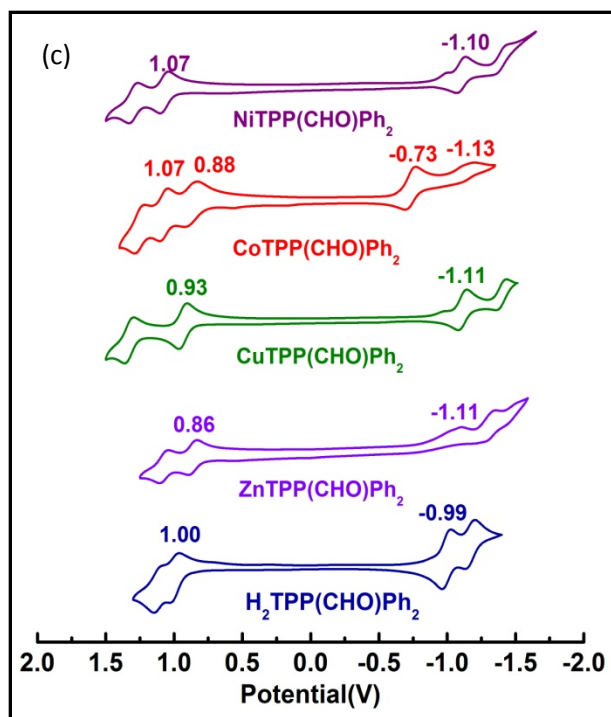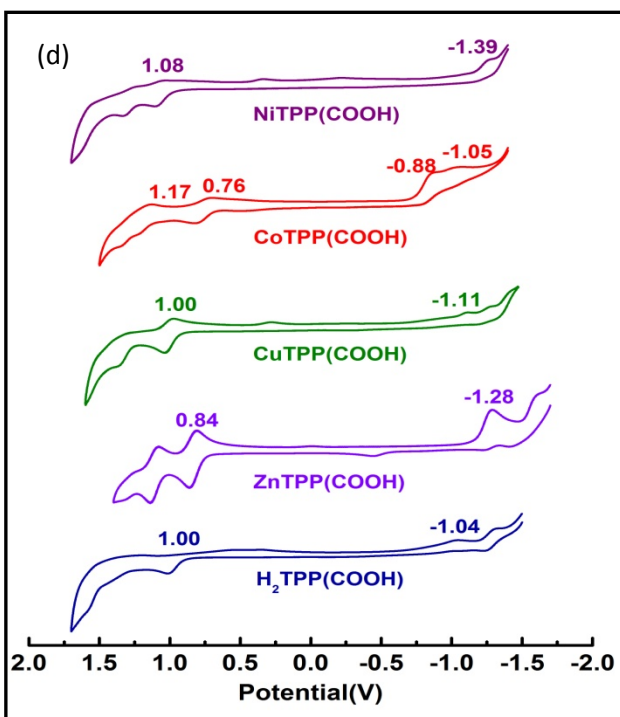

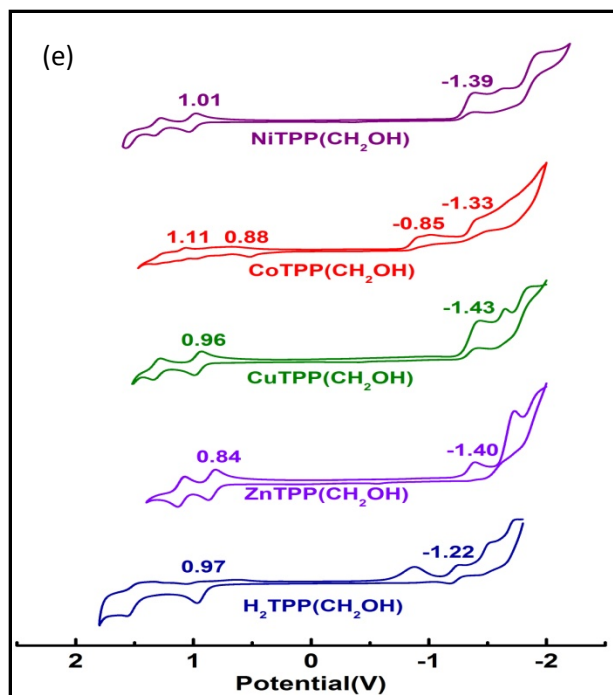

**Figure S26.** Cyclic voltammograms of (a) MTPP(CHO), (b) MTPP(CHO)Br<sub>2</sub>, (c) MTPP(CHO)Ph<sub>2</sub> (d) MTPP(COOH), (e) MTPP(CH<sub>2</sub>OH) (where M = 2H, Zn, Cu, Co, Ni) complexes in CH<sub>2</sub>Cl<sub>2</sub>.

<sup>a</sup>Containing 0.1M TBAPF<sub>6</sub> with a scan rate of 0.1 V/s. Pt Working electrode, Ag/AgCl Reference electrode and Pt wire counter electrode were used

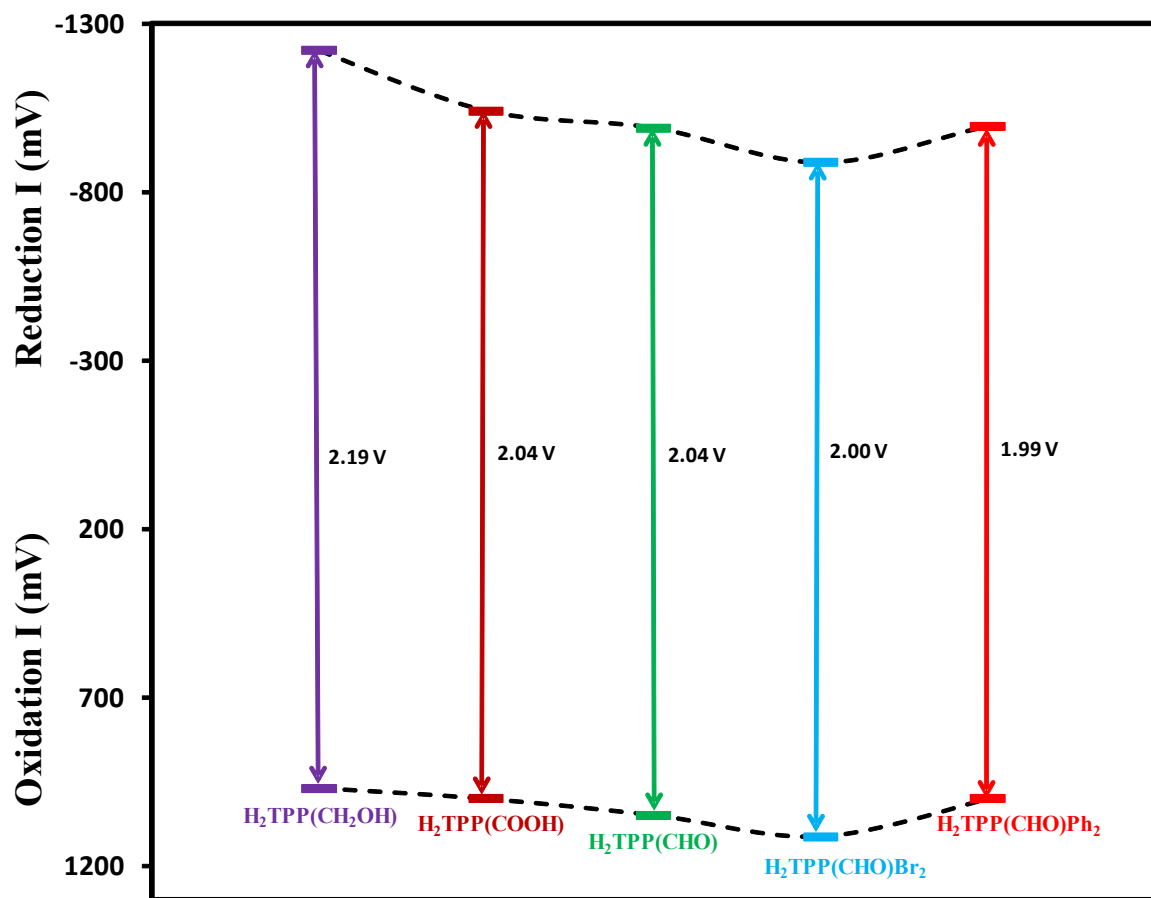

(a)  $\text{H}_2\text{TPP}(\text{X})\text{Y}_2^{\text{a}}$

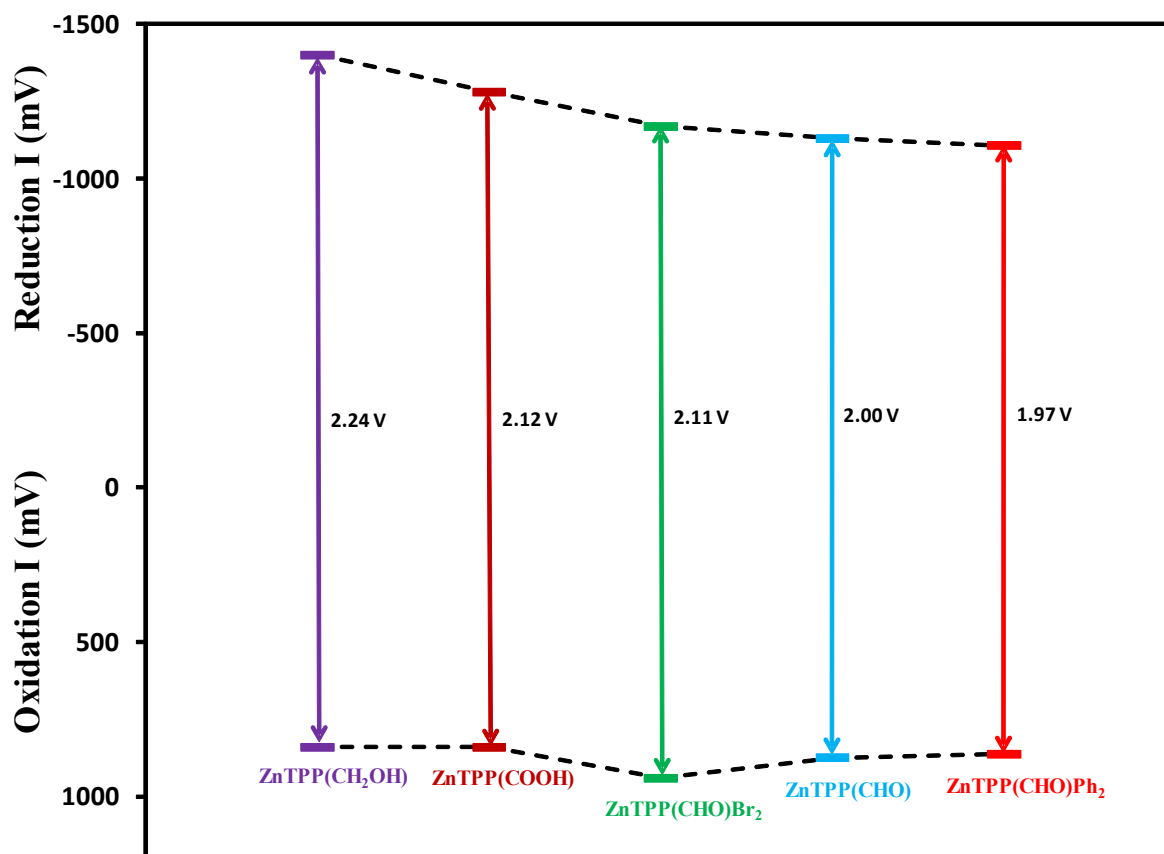

(b) ZnTPP(X)Y<sub>2</sub><sup>a</sup>

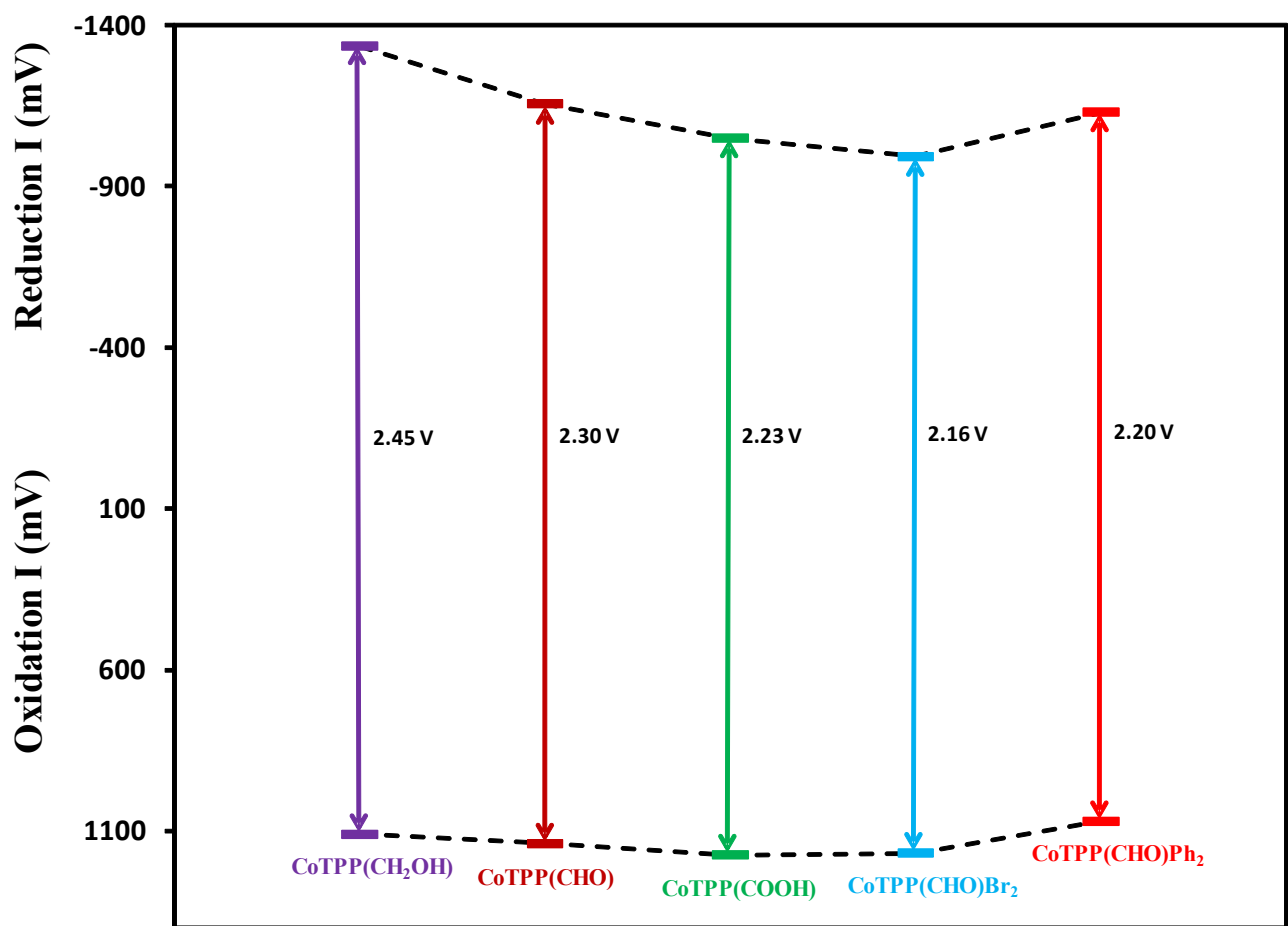

(c) CoTPP(X)Y<sub>2</sub><sup>a</sup>

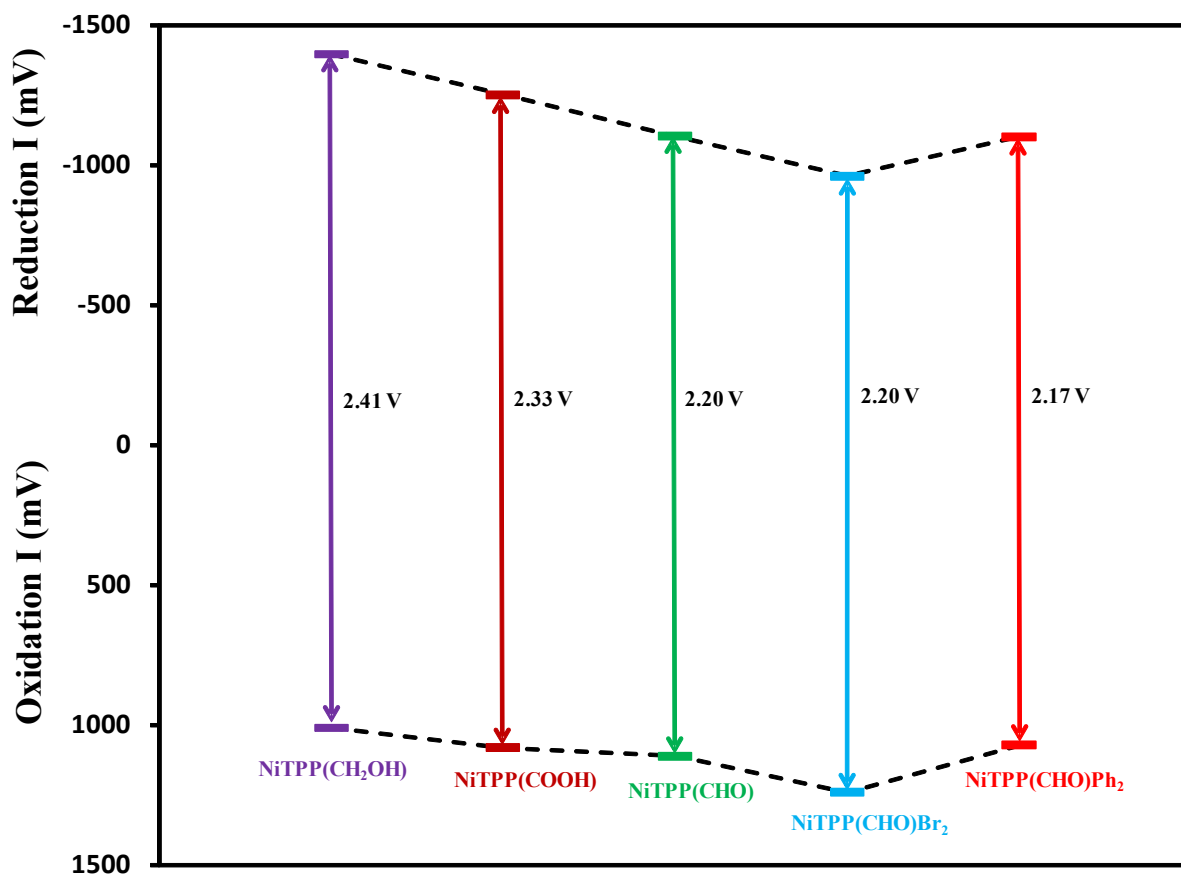

(d) NiTPP(X)Y<sub>2</sub><sup>a</sup>

**Figure S27.** The HOMO-LUMO variation of various Mixed  $\beta$ -substituted porphyrins: (a) H<sub>2</sub>TPP(X)Y<sub>2</sub> (b) ZnTPP(X)Y<sub>2</sub> (c) CoTPP(X)Y<sub>2</sub> (d) NiTPP(X)Y<sub>2</sub> (where X = CHO, COOH, CH<sub>2</sub>OH and Y = H, Br, Ph)

<sup>a</sup> where X = CHO, COOH, CH<sub>2</sub>OH and Y = H, Br, Ph.

**Table S4.** Modulation of frontier and subfrontier orbitals of CuTPP(X)Y<sub>2</sub> w.r.t CuTPP.

| Por.         | E <sub>cg</sub><br>(eV) | I <sub>Ox</sub> | I <sub>Red</sub> | ΔE*(eV)          |                  |                   | δϵ <sub>j</sub> (eV) | δϵ <sub>i</sub><br>(eV) | δϵ <sub>k</sub><br>(eV) |
|--------------|-------------------------|-----------------|------------------|------------------|------------------|-------------------|----------------------|-------------------------|-------------------------|
|              |                         |                 |                  | ΔE <sub>cg</sub> | ΔI <sub>Ox</sub> | ΔI <sub>Red</sub> |                      |                         |                         |
| <b>CuTPP</b> | 2.58                    | 0.97            | -1.3             | -                | -                | -                 | -                    | -                       | -                       |
| <b>1b</b>    | 2.50                    | 1.06            | -1.1             | -0.08            | 0.09             | 0.20              | -0.09                | -0.15                   | -0.20                   |
| <b>2b</b>    | 2.65                    | 0.96            | -1.43            | 0.07             | -0.01            | -0.13             | 0.01                 | 0.12                    | 0.13                    |
| <b>3b</b>    | 2.53                    | 1.00            | -1.11            | -0.05            | 0.03             | 0.19              | -0.03                | -0.26                   | -0.19                   |
| <b>4b</b>    | 2.47                    | 1.07            | -1.1             | -0.11            | 0.10             | 0.20              | -0.10                | -0.09                   | -0.20                   |
| <b>5b</b>    | 2.47                    | 0.93            | -1.11            | -0.11            | -0.03            | 0.19              | 0.04                 | -0.19                   | -0.19                   |

**Table S5.** Modulation of frontier and subfrontier orbitals of ZnTPP(X)Y<sub>2</sub> w.r.t ZnTPP.

| Por.         | E <sub>cg</sub><br>(eV) | I <sub>Ox</sub> | I <sub>Red</sub> | ΔE*(eV)          |                  |                   | δϵ <sub>j</sub><br>(eV) | δϵ <sub>i</sub><br>(eV) | δϵ <sub>k</sub><br>(eV) |
|--------------|-------------------------|-----------------|------------------|------------------|------------------|-------------------|-------------------------|-------------------------|-------------------------|
|              |                         |                 |                  | ΔE <sub>cg</sub> | ΔI <sub>Ox</sub> | ΔI <sub>Red</sub> |                         |                         |                         |
| <b>ZnTPP</b> | 2.54                    | 0.84            | -1.36            | -                | -                | -                 | -                       | -                       | -                       |
| <b>1a</b>    | 2.47                    | 0.88            | -1.13            | -0.07            | 0.04             | 0.23              | -0.04                   | -0.30                   | -0.23                   |
| <b>2a</b>    | 2.55                    | 0.84            | -1.40            | 0.01             | 0.00             | -0.04             | 0                       | 0.06                    | 0.04                    |
| <b>3a</b>    | 2.51                    | 0.84            | -1.28            | -0.03            | 0.00             | 0.08              | 0                       | -0.10                   | -0.08                   |
| <b>4a</b>    | 2.45                    | 0.94            | -1.17            | -0.09            | 0.10             | 0.19              | -0.10                   | -0.11                   | -0.19                   |
| <b>5a</b>    | 2.45                    | 0.86            | -1.11            | -0.09            | 0.02             | 0.25              | -0.02                   | -0.30                   | -0.25                   |



**Table S6.** Modulation of frontier and subfrontier orbitals of CoTPP(X)Y<sub>2</sub> w.r.t CoTPP.

| Por.         | E <sub>cg</sub><br>(eV) | I <sub>Ox</sub> | I <sub>Red</sub> | ΔE*(eV)          |                  |                   | δϵ <sub>j</sub><br>(eV) | δϵ <sub>i</sub><br>(eV) | δϵ <sub>k</sub><br>(eV) |
|--------------|-------------------------|-----------------|------------------|------------------|------------------|-------------------|-------------------------|-------------------------|-------------------------|
|              |                         |                 |                  | ΔE <sub>cg</sub> | ΔI <sub>Ox</sub> | ΔI <sub>Red</sub> |                         |                         |                         |
| <b>CoTPP</b> | 2.69                    | 1.06            | -1.38            | -                | -                | -                 | -                       | -                       | -                       |
| <b>1c</b>    | 2.54                    | 1.14            | -1.16            | -0.14            | 0.08             | 0.22              | -0.08                   | -0.09                   | -0.22                   |
| <b>2c</b>    | 2.69                    | 1.11            | -1.34            | 0.00             | 0.05             | 0.05              | -0.05                   | -0.05                   | -0.05                   |
| <b>3c</b>    | 2.65                    | 1.18            | -1.05            | -0.04            | 0.17             | 0.33              | -0.12                   | -0.47                   | -0.33                   |
| <b>4c</b>    | 2.50                    | 1.17            | -0.99            | -0.19            | 0.11             | 0.39              | -0.11                   | -0.30                   | -0.39                   |
| <b>5c</b>    | 2.50                    | 1.07            | -1.13            | -0.19            | 0.01             | 0.25              | -0.01                   | -0.12                   | -0.25                   |

## References

1. E. Austin and M. Gouterman, *Bioinorg. Chem.* 1978, **9**, 281.
2. (a) D. M. Jamson, J. C. Croney and P. D. J. Moens, *Methods Enzymol.*, 2003, **360**, 1. (b) M. P. Donzello, G. D. Moria, E. Viola, C. Ercolania and G. Ricciardib, *J. Porphyrins Phthalocyanines*, 2014, **18**, 1042. (c) A. M. Brouwer, *Pure Appl. Chem.*, 2011, **83**, 2213.
